# Supplementary material for: Lung environment in healthy old age shapes the phenotype and CCR2-mediated recruitment of a subset of apoptotic, high-turnover alveolar macrophages
Source: Research Square preprint supplement (doi:10.21203/rs.3.rs-7123735/v1), 2025-07-25
Supplement: Supplementary file 1 [file 09c15e553b8c26e0b519139d.xlsx]

## Sheet: Table S1A
Table S1. Differential expression of RNAs in flow cytometry-sorted CD11c+CD11b+ mAMs versus resident AMs from old mice (CD11c+).
(A) Upregulated genes with false discovery rate (FDR) adjusted p-value <0.05 and log2 fold change >1.
baseMean: log2 RPMs in control cells at each time point; log2FoldChange: ratios of normalized counts in CD11c+CD11b+ mAMs / resident AMs from old mice (CD11c+).
lfcSE: log fold-change standard error. pvalue: unadjusted p values. padj: FDR-adjusted p value.
ENSEMBL	SYMBOL	GENENAME	baseMean	log2FoldChange	lfcSE	pvalue	padj
ENSMUSG00000036896.5	C1qc	complement component 1, q subcomponent, C chain	1306.51	6.32201	0.175116	8.13246e-287	3.93286e-284
ENSMUSG00000036887.5	C1qa	complement component 1, q subcomponent, alpha polypeptide	1566.93	6.29482	0.160645	0	0
ENSMUSG00000056071.12	S100a9	S100 calcium binding protein A9 (calgranulin B)	1033.78	5.95141	0.700356	6.197e-19	1.19715e-17
ENSMUSG00000015852.13	Fcrls	Fc receptor-like S, scavenger receptor	146.916	5.89557	0.513869	7.66263e-32	2.44328e-30
ENSMUSG00000040907.15	Atp1a3	ATPase, Na+/K+ transporting, alpha 3 polypeptide	155.513	5.89255	0.444056	1.57874e-41	6.77642e-40
ENSMUSG00000004814.10	Ccl24	chemokine (C-C motif) ligand 24	38.6531	5.83007	0.982935	5.58465e-11	6.22768e-10
ENSMUSG00000052188.6	NA	NA	13.4147	5.69888	1.15755	9.81472e-09	8.81684e-08
ENSMUSG00000036905.8	C1qb	complement component 1, q subcomponent, beta polypeptide	1294.08	5.69848	0.13993	0	0
ENSMUSG00000061100.5	Retnla	resistin like alpha	30.1316	5.64448	0.987829	2.11914e-10	2.24086e-09
ENSMUSG00000030117.5	Gdf3	growth differentiation factor 3	28.3969	5.60701	1.12188	7.65428e-09	6.93618e-08
ENSMUSG00000040165.14	Cd209c	CD209c antigen	10.5205	5.30819	1.18148	7.54568e-08	6.09197e-07
ENSMUSG00000042190.12	Cmklr1	chemokine-like receptor 1	155.097	5.27901	0.355287	3.6804e-51	2.06159e-49
ENSMUSG00000009185.2	Ccl8	chemokine (C-C motif) ligand 8	8.99967	5.1647	1.22845	2.25147e-07	1.71737e-06
ENSMUSG00000033740.17	St18	suppression of tumorigenicity 18	9.03932	5.06884	1.2182	2.78783e-07	2.09999e-06
ENSMUSG00000035373.2	Ccl7	chemokine (C-C motif) ligand 7	126.466	4.97246	0.449676	1.01724e-29	3.04918e-28
ENSMUSG00000017737.2	Mmp9	matrix metallopeptidase 9	198.658	4.96819	0.997759	1.18903e-08	1.05766e-07
ENSMUSG00000040964.16	Arhgef10l	Rho guanine nucleotide exchange factor (GEF) 10-like	53.2811	4.90596	0.61243	4.3894e-17	7.5452e-16
ENSMUSG00000042286.13	Stab1	stabilin 1	296.032	4.805	0.25279	8.49769e-82	8.3867e-80
ENSMUSG00000039691.10	Tspan10	tetraspanin 10	17.8094	4.79738	1.04296	6.73992e-08	5.46884e-07
ENSMUSG00000004891.16	Nes	nestin	14.6558	4.76297	1.21962	7.43703e-07	5.33877e-06
ENSMUSG00000031494.7	Cd209a	CD209a antigen	76.1109	4.73708	0.390772	3.88902e-35	1.41408e-33
ENSMUSG00000039809.10	Gabbr2	gamma-aminobutyric acid (GABA) B receptor, 2	7.89178	4.70182	1.285	1.45159e-06	1.00332e-05
ENSMUSG00000026228.6	Htr2b	5-hydroxytryptamine (serotonin) receptor 2B	22.7125	4.656	0.875116	2.34017e-09	2.2351e-08
ENSMUSG00000021219.16	Rgs6	regulator of G-protein signaling 6	14.1662	4.60471	1.06423	2.12784e-07	1.62906e-06
ENSMUSG00000027360.5	Hdc	histidine decarboxylase	284.425	4.57777	0.654274	8.01802e-14	1.12283e-12
ENSMUSG00000010461.15	Eya4	EYA transcriptional coactivator and phosphatase 4	19.1778	4.55358	1.06868	2.7676e-07	2.08782e-06
ENSMUSG00000040950.13	Mgl2	macrophage galactose N-acetyl-galactosamine specific lectin 2	236.445	4.50483	0.215843	4.71077e-98	5.74318e-96
ENSMUSG00000026579.8	F5	coagulation factor V	25.9227	4.50007	1.24451	1.89471e-06	1.29054e-05
ENSMUSG00000002985.16	Apoe	apolipoprotein E	11386.2	4.46009	0.0342331	0	0
ENSMUSG00000040152.8	Thbs1	thrombospondin 1	499.014	4.33709	0.246519	1.11165e-70	9.16355e-69
ENSMUSG00000039115.13	Itga9	integrin alpha 9	25.2305	4.29019	0.770333	6.0966e-10	6.17233e-09
ENSMUSG00000022816.11	Fstl1	follistatin-like 1	1710.7	4.26037	0.0717221	0	0
ENSMUSG00000033350.7	Chst2	carbohydrate sulfotransferase 2	22.9055	4.15731	0.682961	2.8592e-11	3.28435e-10
ENSMUSG00000022103.10	Gfra2	glial cell line derived neurotrophic factor family receptor alpha 2	14.1059	4.14496	0.925778	1.40116e-07	1.09881e-06
ENSMUSG00000037139.15	Myom3	myomesin family, member 3	20.9053	4.14281	0.789174	3.48708e-09	3.26391e-08
ENSMUSG00000079625.2	Tm4sf19	transmembrane 4 L six family member 19	20.8375	4.13932	0.782603	2.8257e-09	2.67244e-08
ENSMUSG00000033316.14	Galnt9	polypeptide N-acetylgalactosaminyltransferase 9	21.4255	4.11501	0.707115	1.43207e-10	1.53672e-09
ENSMUSG00000101389.1	Ms4a4a	membrane-spanning 4-domains, subfamily A, member 4A	25.7357	4.10835	0.775895	2.74553e-09	2.60171e-08
ENSMUSG00000043300.2	B3galnt1	UDP-GalNAc:betaGlcNAc beta 1,3-galactosaminyltransferase, polypeptide 1	18.8756	4.10534	0.795865	5.64654e-09	5.17825e-08
ENSMUSG00000022237.17	Ankrd33b	ankyrin repeat domain 33B	117.965	4.09077	0.347245	1.48004e-33	5.05233e-32
ENSMUSG00000035273.14	Hpse	heparanase	236.923	4.08174	0.186193	5.17458e-108	7.28862e-106
ENSMUSG00000040987.15	Mill2	MHC I like leukocyte 2	7.93843	4.0577	1.47707	1.39401e-05	8.29207e-05
ENSMUSG00000022651.6	Retnlg	resistin like gamma	57.6388	4.0386	1.36101	1.00542e-05	6.10828e-05
ENSMUSG00000027765.6	P2ry1	purinergic receptor P2Y, G-protein coupled 1	12.3045	4.03472	1.15475	3.53676e-06	2.31028e-05
ENSMUSG00000031451.6	Gas6	growth arrest specific 6	81.7742	4.03289	0.357148	4.13074e-31	1.29997e-29
ENSMUSG00000006205.13	Htra1	HtrA serine peptidase 1	20.8034	4.02529	0.726675	7.20666e-10	7.23058e-09
ENSMUSG00000005089.15	Slc1a2	solute carrier family 1 (glial high affinity glutamate transporter), member 2	42.2997	4.02445	0.448019	7.2035e-21	1.4994e-19
ENSMUSG00000032487.8	Ptgs2	prostaglandin-endoperoxide synthase 2	301.227	4.01655	0.350207	5.37492e-32	1.72521e-30
ENSMUSG00000027848.12	Olfml3	olfactomedin-like 3	146.972	3.99777	0.285939	5.87012e-46	2.84829e-44
ENSMUSG00000040536.15	Necab1	N-terminal EF-hand calcium binding protein 1	85.7504	3.99369	0.308813	8.43888e-40	3.50806e-38
ENSMUSG00000040552.8	C3ar1	complement component 3a receptor 1	415.062	3.94721	0.159252	3.67787e-137	7.62264e-135
ENSMUSG00000039196.2	Orm1	orosomucoid 1	23.0905	3.94658	0.613914	3.18977e-12	3.94856e-11
ENSMUSG00000044749.13	Abca6	ATP-binding cassette, sub-family A (ABC1), member 6	6.36513	3.91311	1.53432	2.11329e-05	0.000121907
ENSMUSG00000022534.14	Mefv	Mediterranean fever	64.1832	3.89034	0.877305	1.83915e-07	1.41928e-06
ENSMUSG00000029819.6	Npy	neuropeptide Y	18.2836	3.83485	0.697714	9.4006e-10	9.29679e-09
ENSMUSG00000025856.15	Pdgfa	platelet derived growth factor, alpha	76.4132	3.8087	0.333375	8.05193e-32	2.55618e-30
ENSMUSG00000042834.15	Nrep	neuronal regeneration related protein	13.9937	3.72734	1.25053	1.26978e-05	7.60926e-05
ENSMUSG00000024600.8	Slc27a6	solute carrier family 27 (fatty acid transporter), member 6	29.9025	3.72065	0.493698	1.20668e-15	1.89876e-14
ENSMUSG00000032087.10	Dscaml1	DS cell adhesion molecule like 1	6.5668	3.63297	1.58368	3.87968e-05	0.000212482
ENSMUSG00000041608.8	Entpd3	ectonucleoside triphosphate diphosphohydrolase 3	32.3615	3.60218	0.58152	1.51505e-11	1.77261e-10
ENSMUSG00000039313.14	Minar1	membrane integral NOTCH2 associated receptor 1	12.7522	3.59432	1.24459	1.66064e-05	9.76592e-05
ENSMUSG00000040133.2	Gpr176	G protein-coupled receptor 176	18.1092	3.53563	0.651049	1.51645e-09	1.47063e-08
ENSMUSG00000068154.5	Insm1	insulinoma-associated 1	11.6591	3.49865	0.982965	4.30759e-06	2.78496e-05
ENSMUSG00000054675.5	Tmem119	transmembrane protein 119	12.7216	3.48412	1.28073	2.40516e-05	0.000137162
ENSMUSG00000035226.5	Rims4	regulating synaptic membrane exocytosis 4	13.4088	3.4726	0.773332	1.80273e-07	1.39265e-06
ENSMUSG00000032561.15	Acpp	acid phosphatase, prostate	58.4359	3.46437	0.333263	6.69323e-27	1.78502e-25
ENSMUSG00000025855.13	Prkar1b	protein kinase, cAMP dependent regulatory, type I beta	24.9905	3.44913	0.599428	2.46507e-10	2.59341e-09
ENSMUSG00000078795.2	Ceacam15	carcinoembryonic antigen-related cell adhesion molecule 15	16.3304	3.44902	0.696795	2.09116e-08	1.80681e-07
ENSMUSG00000046447.3	Camk2n1	calcium/calmodulin-dependent protein kinase II inhibitor 1	35.6255	3.44311	0.446768	3.48455e-16	5.75129e-15
ENSMUSG00000023367.14	Tmem176a	transmembrane protein 176A	161.042	3.4416	0.212053	7.78578e-61	5.4046e-59
ENSMUSG00000102975.1	NA	NA	11.6005	3.43922	1.60293	5.63009e-05	0.000297998
ENSMUSG00000033768.17	Nrxn2	neurexin II	22.616	3.42792	0.527973	2.36845e-12	2.96988e-11
ENSMUSG00000032232.14	Cgnl1	cingulin-like 1	18.0516	3.42761	0.61701	7.99496e-10	7.96094e-09
ENSMUSG00000020961.15	Ston2	stonin 2	23.2841	3.4168	0.732944	8.67628e-08	6.93147e-07
ENSMUSG00000029299.14	Abcg3	ATP binding cassette subfamily G member 3	43.6869	3.41583	0.405189	9.32891e-19	1.7879e-17
ENSMUSG00000029810.15	Tmem176b	transmembrane protein 176B	305.886	3.41017	0.15603	1.72338e-107	2.40411e-105
ENSMUSG00000060311.11	Mucl1	mucin-like 1	42.0943	3.40185	0.364651	2.87064e-22	6.45693e-21
ENSMUSG00000020312.12	Shc2	SHC (Src homology 2 domain containing) transforming protein 2	29.5158	3.38209	0.457131	3.88922e-15	5.97087e-14
ENSMUSG00000029189.10	Sel1l3	sel-1 suppressor of lin-12-like 3 (C. elegans)	8.80998	3.38176	1.40669	4.2479e-05	0.000230992
ENSMUSG00000052631.15	Sh2d6	SH2 domain containing 6	7.30856	3.32322	1.66613	7.50151e-05	0.000386752
ENSMUSG00000024451.9	Arap3	ArfGAP with RhoGAP domain, ankyrin repeat and PH domain 3	191.678	3.30515	0.183709	6.18697e-74	5.50678e-72
ENSMUSG00000027347.18	Rasgrp1	RAS guanyl releasing protein 1	123.603	3.28564	0.223424	1.64974e-50	8.99791e-49
ENSMUSG00000017009.3	Sdc4	syndecan 4	75.9149	3.27283	0.284265	3.25898e-32	1.05303e-30
ENSMUSG00000027470.9	Mylk2	myosin, light polypeptide kinase 2, skeletal muscle	13.9117	3.26831	0.771256	5.9353e-07	4.29473e-06
ENSMUSG00000021062.15	Rab15	RAB15, member RAS oncogene family	32.2735	3.26631	0.960111	7.45698e-06	4.62135e-05
ENSMUSG00000028195.4	Ccn1	cellular communication network factor 1	9.94629	3.25004	1.38601	5.18094e-05	0.000277055
ENSMUSG00000031871.9	Cdh5	cadherin 5	11.238	3.24281	0.784211	8.88498e-07	6.30951e-06
ENSMUSG00000020388.12	Pdlim4	PDZ and LIM domain 4	53.1222	3.24187	0.332975	6.41264e-24	1.53017e-22
ENSMUSG00000022246.14	Rai14	retinoic acid induced 14	256.691	3.21454	0.148987	8.82475e-105	1.17458e-102
ENSMUSG00000019987.9	Arg1	arginase, liver	102.504	3.21	0.233009	1.06695e-44	4.96131e-43
ENSMUSG00000039116.7	Adgrg6	adhesion G protein-coupled receptor G6	125.911	3.20763	0.218889	3.81417e-50	2.04948e-48
ENSMUSG00000053338.9	Tarm1	T cell-interacting, activating receptor on myeloid cells 1	58.2588	3.172	0.537582	1.29973e-10	1.40825e-09
ENSMUSG00000059412.7	Fxyd2	FXYD domain-containing ion transport regulator 2	13.4688	3.15838	1.05885	1.94228e-05	0.000113031
ENSMUSG00000014599.10	Csf1	colony stimulating factor 1 (macrophage)	780.851	3.15595	0.118208	1.53016e-158	3.52373e-156
ENSMUSG00000023951.17	Vegfa	vascular endothelial growth factor A	122.669	3.15576	0.259736	1.86384e-35	6.86309e-34
ENSMUSG00000031740.8	Mmp2	matrix metallopeptidase 2	347.911	3.14325	0.131803	3.3554e-127	5.9366e-125
ENSMUSG00000039007.10	Cpq	carboxypeptidase Q	61.5455	3.1317	0.30529	3.70487e-26	9.59827e-25
ENSMUSG00000040562.12	Gstm2	glutathione S-transferase, mu 2	12.6651	3.10675	0.721764	5.29516e-07	3.87209e-06
ENSMUSG00000072720.9	Myo18b	myosin XVIIIb	6.67678	3.10634	1.50112	8.53389e-05	0.000435489
ENSMUSG00000063060.6	Sox7	SRY (sex determining region Y)-box 7	180.452	3.09475	0.177376	1.23247e-69	9.87883e-68
ENSMUSG00000041324.14	Inhba	inhibin beta-A	139.761	3.09387	0.197933	1.54554e-56	9.83452e-55
ENSMUSG00000022415.12	Syngr1	synaptogyrin 1	394.087	3.02571	0.111315	4.01479e-164	9.70776e-162
ENSMUSG00000054594.13	Oscar	osteoclast associated receptor	10.322	3.02308	0.815711	4.1679e-06	2.69789e-05
ENSMUSG00000038179.13	Slamf7	SLAM family member 7	770.892	3.02088	0.082214	5.40486e-297	3.13655e-294
ENSMUSG00000050777.7	Tmem37	transmembrane protein 37	67.9696	3.01293	0.306725	3.61755e-24	8.70371e-23
ENSMUSG00000037347.7	Chst7	carbohydrate (N-acetylglucosamino) sulfotransferase 7	13.9209	3.01047	0.72497	1.03066e-06	7.24812e-06
ENSMUSG00000028347.14	Tmeff1	transmembrane protein with EGF-like and two follistatin-like domains 1	13.2029	3.00089	0.67741	3.55608e-07	2.6498e-06
ENSMUSG00000047222.7	Rnase2a	ribonuclease, RNase A family, 2A (liver, eosinophil-derived neurotoxin)	172.29	2.99365	0.183069	1.66471e-61	1.16675e-59
ENSMUSG00000039109.16	F13a1	coagulation factor XIII, A1 subunit	45.7419	2.98149	0.451446	1.78862e-12	2.25843e-11
ENSMUSG00000015968.18	Cacna1d	calcium channel, voltage-dependent, L type, alpha 1D subunit	53.685	2.97718	0.314919	1.39778e-22	3.19857e-21
ENSMUSG00000042333.16	Tnfrsf14	tumor necrosis factor receptor superfamily, member 14 (herpesvirus entry mediator)	22.258	2.96601	0.5342	1.32055e-09	1.28754e-08
ENSMUSG00000076671.5	NA	NA	6.48981	2.96575	1.20225	5.44975e-05	0.000289615
ENSMUSG00000019874.11	Fabp7	fatty acid binding protein 7, brain	9.46347	2.96287	0.946659	1.68934e-05	9.92668e-05
ENSMUSG00000022494.15	Shisa9	shisa family member 9	6.74393	2.96025	1.4902	0.000108516	0.000539902
ENSMUSG00000073420.10	NA	NA	15.0106	2.94476	0.665999	3.91955e-07	2.90275e-06
ENSMUSG00000012350.15	Ehf	ets homologous factor	17.0004	2.90091	0.564591	1.4076e-08	1.24445e-07
ENSMUSG00000040612.13	Ildr2	immunoglobulin-like domain containing receptor 2	25.0757	2.89706	0.50636	5.46417e-10	5.5592e-09
ENSMUSG00000030109.15	Slc6a12	solute carrier family 6 (neurotransmitter transporter, betaine/GABA), member 12	26.3233	2.88789	0.453629	1.00566e-11	1.19494e-10
ENSMUSG00000099398.1	Ms4a14	membrane-spanning 4-domains, subfamily A, member 14	39.2974	2.87067	0.447955	7.83875e-12	9.42209e-11
ENSMUSG00000056124.5	B4galt6	UDP-Gal:betaGlcNAc beta 1,4-galactosyltransferase, polypeptide 6	67.4174	2.87064	0.287513	9.05454e-25	2.2571e-23
ENSMUSG00000003882.5	Il7r	interleukin 7 receptor	411.811	2.85541	0.108931	9.47464e-153	2.14778e-150
ENSMUSG00000033022.8	Cdo1	cysteine dioxygenase 1, cytosolic	116.503	2.82695	0.196678	4.08417e-48	2.09375e-46
ENSMUSG00000022126.6	Acod1	aconitate decarboxylase 1	388.781	2.81477	0.195535	3.05227e-48	1.5703e-46
ENSMUSG00000033278.10	Ptprm	protein tyrosine phosphatase, receptor type, M	14.0231	2.79677	0.67748	1.40085e-06	9.72417e-06
ENSMUSG00000029231.15	Pdgfra	platelet derived growth factor receptor, alpha polypeptide	9.12742	2.79486	0.793751	8.14349e-06	5.02534e-05
ENSMUSG00000018217.12	Pmp22	peripheral myelin protein 22	284.527	2.7754	0.140935	1.46593e-87	1.53005e-85
ENSMUSG00000030605.15	Mfge8	milk fat globule-EGF factor 8 protein	6818.58	2.76845	0.0265327	0	0
ENSMUSG00000097418.7	Mir155hg	Mir155 host gene (non-protein coding)	19.2726	2.75661	0.531915	1.38139e-08	1.22202e-07
ENSMUSG00000028715.2	Cyp4a14	cytochrome P450, family 4, subfamily a, polypeptide 14	6.7134	2.74391	1.54178	0.00017127	0.000821959
ENSMUSG00000015709.9	Arnt2	aryl hydrocarbon receptor nuclear translocator 2	426.642	2.7291	0.100074	6.06619e-165	1.51739e-162
ENSMUSG00000028341.9	Nr4a3	nuclear receptor subfamily 4, group A, member 3	927.742	2.72811	0.0715673	0	0
ENSMUSG00000019990.15	Pde7b	phosphodiesterase 7B	13.6321	2.71231	0.868486	2.0768e-05	0.000120184
ENSMUSG00000046314.16	Stxbp6	syntaxin binding protein 6 (amisyn)	50.1476	2.70419	0.323714	4.61229e-18	8.47027e-17
ENSMUSG00000062991.9	Nrg1	neuregulin 1	13.9105	2.6971	0.692005	3.24542e-06	2.13342e-05
ENSMUSG00000037762.6	Slc16a9	solute carrier family 16 (monocarboxylic acid transporters), member 9	20.055	2.68515	0.50434	7.26194e-09	6.60127e-08
ENSMUSG00000060470.7	Adgrg3	adhesion G protein-coupled receptor G3	25.8631	2.66924	0.545943	6.94543e-08	5.62929e-07
ENSMUSG00000003418.11	St8sia6	ST8 alpha-N-acetyl-neuraminide alpha-2,8-sialyltransferase 6	33.8786	2.65269	0.421662	2.44555e-11	2.8226e-10
ENSMUSG00000024899.7	Papss2	3'-phosphoadenosine 5'-phosphosulfate synthase 2	84.794	2.64166	0.229131	7.33301e-32	2.34333e-30
ENSMUSG00000030786.18	Itgam	integrin alpha M	386.489	2.63873	0.121263	4.29019e-106	5.87189e-104
ENSMUSG00000004267.16	Eno2	enolase 2, gamma neuronal	89.0619	2.61949	0.217078	1.28159e-34	4.56837e-33
ENSMUSG00000026069.15	Il1rl1	interleukin 1 receptor-like 1	28.2196	2.61504	0.423416	5.454e-11	6.11016e-10
ENSMUSG00000061132.13	Blnk	B cell linker	200.733	2.59732	0.145899	5.76603e-72	4.89202e-70
ENSMUSG00000049848.7	Ceacam19	carcinoembryonic antigen-related cell adhesion molecule 19	25.4509	2.59404	0.423694	7.9395e-11	8.71963e-10
ENSMUSG00000041361.13	Myzap	myocardial zonula adherens protein	9.08199	2.57607	1.29932	0.00015319	0.000742807
ENSMUSG00000016283.13	H2-M2	histocompatibility 2, M region locus 2	676.541	2.55509	0.07741	5.91759e-240	2.32033e-237
ENSMUSG00000015957.12	Wnt11	wingless-type MMTV integration site family, member 11	26.8139	2.54814	0.408656	4.22738e-11	4.76912e-10
ENSMUSG00000094152.5	Slc6a16	solute carrier family 6, member 16	8.00073	2.54761	0.961317	5.56211e-05	0.000295046
ENSMUSG00000027993.16	Trim2	tripartite motif-containing 2	12.0329	2.54749	0.830195	2.61813e-05	0.000147912
ENSMUSG00000036019.8	Tmtc2	transmembrane and tetratricopeptide repeat containing 2	37.5205	2.52944	0.36593	4.65307e-13	6.17628e-12
ENSMUSG00000029084.5	Cd38	CD38 antigen	16.9599	2.52468	0.516682	8.76092e-08	6.99524e-07
ENSMUSG00000052485.7	Tmem171	transmembrane protein 171	41.2108	2.51605	0.330687	2.7801e-15	4.2954e-14
ENSMUSG00000074934.3	Grem1	gremlin 1, DAN family BMP antagonist	18.9315	2.5054	0.50444	6.12972e-08	4.99046e-07
ENSMUSG00000050071.8	Bex1	brain expressed X-linked 1	7.06612	2.50003	1.1193	0.000112581	0.000558178
ENSMUSG00000040751.12	Lat2	linker for activation of T cells family, member 2	116.482	2.48861	0.199149	8.30227e-37	3.14489e-35
ENSMUSG00000030745.9	Il21r	interleukin 21 receptor	141.375	2.48795	0.190463	5.71869e-40	2.3841e-38
ENSMUSG00000106219.1	5830416I19Rik	RIKEN cDNA 5830416I19 gene	14.7417	2.48413	0.586285	1.35742e-06	9.43624e-06
ENSMUSG00000041957.15	Pkp2	plakophilin 2	102.849	2.47245	0.193418	2.23816e-38	8.94523e-37
ENSMUSG00000022836.11	Mylk	myosin, light polypeptide kinase	8.86304	2.46254	0.947647	6.45372e-05	0.000337895
ENSMUSG00000089762.3	Ier5l	immediate early response 5-like	11.0308	2.45873	0.839622	3.63475e-05	0.000200049
ENSMUSG00000049723.14	Mmp12	matrix metallopeptidase 12	3447.35	2.44317	0.0365594	0	0
ENSMUSG00000000881.12	Dlg3	discs large MAGUK scaffold protein 3	33.0798	2.43975	0.357276	9.91038e-13	1.27577e-11
ENSMUSG00000057329.7	Bcl2	B cell leukemia/lymphoma 2	56.2031	2.43771	0.287286	2.51817e-18	4.69584e-17
ENSMUSG00000024990.13	Rbp4	retinol binding protein 4, plasma	9.11265	2.43745	0.929119	6.30267e-05	0.000330822
ENSMUSG00000090523.2	Gypc	glycophorin C	20.9114	2.42991	0.454359	9.78103e-09	8.79202e-08
ENSMUSG00000002578.18	Ikzf4	IKAROS family zinc finger 4	125.779	2.4252	0.190435	4.55373e-38	1.79526e-36
ENSMUSG00000037568.12	Vash2	vasohibin 2	7.03521	2.41204	1.5826	0.000318012	0.00143462
ENSMUSG00000018924.6	Alox15	arachidonate 15-lipoxygenase	8.7188	2.41187	1.28692	0.000205002	0.000968152
ENSMUSG00000058254.12	Tspan7	tetraspanin 7	5.57975	2.41029	1.79529	0.000368171	0.00163998
ENSMUSG00000067591.12	Klra3	killer cell lectin-like receptor, subfamily A, member 3	20.7933	2.40862	0.439004	4.75632e-09	4.39241e-08
ENSMUSG00000021747.12	4930452B06Rik	RIKEN cDNA 4930452B06 gene	10.4851	2.40527	0.749485	2.19859e-05	0.000126176
ENSMUSG00000091311.3	Spata31d1b	spermatogenesis associated 31 subfamily D, member 1B	9.90973	2.40095	0.876491	5.30395e-05	0.000282799
ENSMUSG00000074093.4	Svip	small VCP/p97-interacting protein	8.52959	2.3944	0.989456	9.08853e-05	0.000461359
ENSMUSG00000030246.11	Ldhb	lactate dehydrogenase B	17.3115	2.39207	0.532849	5.92186e-07	4.28714e-06
ENSMUSG00000021338.17	Carmil1	capping protein regulator and myosin 1 linker 1	19.2141	2.39144	0.513244	2.94792e-07	2.21598e-06
ENSMUSG00000003352.14	Cacnb3	calcium channel, voltage-dependent, beta 3 subunit	670.823	2.38784	0.0829525	4.23343e-183	1.22837e-180
ENSMUSG00000020010.7	Vnn3	vanin 3	55.6392	2.38046	0.305512	8.6235e-16	1.37483e-14
ENSMUSG00000062939.11	Stat4	signal transducer and activator of transcription 4	114.198	2.37725	0.189236	4.51329e-37	1.72313e-35
ENSMUSG00000026315.13	Serpinb8	serine (or cysteine) peptidase inhibitor, clade B, member 8	47.7772	2.36939	0.316464	9.36596e-15	1.40084e-13
ENSMUSG00000069662.5	Marcks	myristoylated alanine rich protein kinase C substrate	663.63	2.36925	0.0831317	1.59187e-179	4.44132e-177
ENSMUSG00000030865.4	Chp2	calcineurin-like EF hand protein 2	26.002	2.36428	0.439247	9.05012e-09	8.14511e-08
ENSMUSG00000048078.16	Tenm4	teneurin transmembrane protein 4	26.4221	2.36223	0.413753	1.45682e-09	1.41659e-08
ENSMUSG00000034612.7	Chst11	carbohydrate sulfotransferase 11	203.751	2.35506	0.142801	5.83979e-62	4.13286e-60
ENSMUSG00000041548.4	Hspb8	heat shock protein 8	85.8468	2.35002	0.21325	4.27755e-29	1.25371e-27
ENSMUSG00000027173.7	Depdc7	DEP domain containing 7	21.1602	2.34987	0.462973	4.55445e-08	3.75859e-07
ENSMUSG00000075585.3	NA	NA	15.3581	2.34611	0.554774	1.6144e-06	1.11109e-05
ENSMUSG00000026070.15	Il18r1	interleukin 18 receptor 1	134.179	2.34249	0.175078	1.13161e-41	4.87279e-40
ENSMUSG00000024247.14	Pkdcc	protein kinase domain containing, cytoplasmic	220.059	2.33091	0.130798	7.12375e-72	6.0088e-70
ENSMUSG00000030329.11	Pianp	PILR alpha associated neural protein	177.531	2.3298	0.147546	5.30039e-57	3.40257e-55
ENSMUSG00000025321.14	Itgb8	integrin beta 8	39.8025	2.32828	0.321912	6.79075e-14	9.58368e-13
ENSMUSG00000001504.10	Irx2	Iroquois homeobox 2	40.8635	2.32749	0.308681	6.76273e-15	1.02308e-13
ENSMUSG00000062148.6	Ear6	eosinophil-associated, ribonuclease A family, member 6	743.278	2.32445	0.0700495	2.81769e-242	1.16797e-239
ENSMUSG00000026177.11	Slc11a1	solute carrier family 11 (proton-coupled divalent metal ion transporters), member 1	1215.13	2.32338	0.0600181	0	0
ENSMUSG00000023913.17	Pla2g7	phospholipase A2, group VII (platelet-activating factor acetylhydrolase, plasma)	702.396	2.31166	0.075457	6.27995e-207	2.16928e-204
ENSMUSG00000058046.1	4933430I17Rik	RIKEN cDNA 4933430I17 gene	46.672	2.30716	0.312341	2.24949e-14	3.27667e-13
ENSMUSG00000029321.1	Slc10a6	solute carrier family 10 (sodium/bile acid cotransporter family), member 6	48.4976	2.30366	0.274845	7.90793e-18	1.4341e-16
ENSMUSG00000054263.12	Lifr	LIF receptor alpha	33.5566	2.29557	0.397592	1.12248e-09	1.10108e-08
ENSMUSG00000085786.1	NA	NA	14.0479	2.28063	0.586665	4.86794e-06	3.11944e-05
ENSMUSG00000037944.8	Ccr7	chemokine (C-C motif) receptor 7	1155.34	2.28054	0.0599264	0	0
ENSMUSG00000104000.1	NA	NA	17.8324	2.27951	0.473375	1.7224e-07	1.33486e-06
ENSMUSG00000050578.10	Mmp13	matrix metallopeptidase 13	11.7677	2.27493	0.689447	1.9931e-05	0.00011571
ENSMUSG00000021950.15	Anxa8	annexin A8	25.1794	2.26649	0.427153	1.58954e-08	1.39933e-07
ENSMUSG00000023274.14	Cd4	CD4 antigen	207.693	2.26469	0.141366	1.53563e-58	1.02668e-56
ENSMUSG00000026770.5	Il2ra	interleukin 2 receptor, alpha chain	73.8261	2.26351	0.231407	2.22341e-23	5.22809e-22
ENSMUSG00000015665.8	Awat1	acyl-CoA wax alcohol acyltransferase 1	566.839	2.2623	0.0829702	1.77646e-164	4.36829e-162
ENSMUSG00000074622.4	Mafb	v-maf musculoaponeurotic fibrosarcoma oncogene family, protein B (avian)	464.715	2.25388	0.103455	5.3393e-106	7.23949e-104
ENSMUSG00000005251.15	Ripk4	receptor-interacting serine-threonine kinase 4	18.5094	2.24772	0.508475	9.0233e-07	6.40147e-06
ENSMUSG00000024529.14	Lox	lysyl oxidase	14.636	2.23937	0.577369	5.14157e-06	3.27885e-05
ENSMUSG00000044667.12	Plppr4	phospholipid phosphatase related 4	10.0336	2.22735	0.739314	3.61987e-05	0.000199306
ENSMUSG00000020178.6	Adora2a	adenosine A2a receptor	90.599	2.21841	0.199146	1.4456e-29	4.30653e-28
ENSMUSG00000011256.16	Adam19	a disintegrin and metallopeptidase domain 19 (meltrin beta)	316.113	2.21235	0.113314	1.25721e-85	1.27549e-83
ENSMUSG00000047747.10	Rnf150	ring finger protein 150	58.8323	2.20664	0.288481	3.64559e-15	5.60872e-14
ENSMUSG00000099760.1	NA	NA	16.4762	2.20544	0.523009	1.9092e-06	1.29858e-05
ENSMUSG00000041046.7	Ramp3	receptor (calcitonin) activity modifying protein 3	124.774	2.1949	0.180954	1.38489e-34	4.91247e-33
ENSMUSG00000041797.7	Abca9	ATP-binding cassette, sub-family A (ABC1), member 9	178.483	2.18073	0.155181	1.43269e-45	6.85988e-44
ENSMUSG00000071068.7	Treml2	triggering receptor expressed on myeloid cells-like 2	197.05	2.17254	0.150899	1.05876e-47	5.3708e-46
ENSMUSG00000000957.11	Mmp14	matrix metallopeptidase 14 (membrane-inserted)	448.405	2.16564	0.097236	1.3809e-110	1.98358e-108
ENSMUSG00000017652.16	Cd40	CD40 antigen	83.3733	2.16251	0.213737	9.15181e-25	2.27744e-23
ENSMUSG00000063594.5	Gng8	guanine nucleotide binding protein (G protein), gamma 8	18.709	2.15125	0.506245	1.78706e-06	1.22411e-05
ENSMUSG00000038594.9	Cep85l	centrosomal protein 85-like	63.0013	2.14804	0.265802	1.28673e-16	2.17574e-15
ENSMUSG00000022303.9	Dcstamp	dendrocyte expressed seven transmembrane protein	38.7396	2.14013	0.315745	2.42083e-12	3.02553e-11
ENSMUSG00000049571.18	Cfap46	cilia and flagella associated protein 46	148.095	2.139	0.247837	1.25094e-18	2.37859e-17
ENSMUSG00000029581.14	Fscn1	fascin actin-bundling protein 1	854.055	2.13205	0.0650455	2.60611e-236	9.94984e-234
ENSMUSG00000079037.9	Prnp	prion protein	105.392	2.12726	0.193348	7.895e-29	2.27715e-27
ENSMUSG00000030306.14	Tmtc1	transmembrane and tetratricopeptide repeat containing 1	7.82446	2.12621	1.20511	0.000304802	0.00138276
ENSMUSG00000061878.15	Sphk1	sphingosine kinase 1	39.7043	2.1155	0.315925	4.4133e-12	5.37599e-11
ENSMUSG00000002847.7	Pla1a	phospholipase A1 member A	35.8228	2.11412	0.359159	7.72835e-10	7.72196e-09
ENSMUSG00000026700.4	Tnfsf4	tumor necrosis factor (ligand) superfamily, member 4	9.17699	2.11073	0.903959	0.000126414	0.000621489
ENSMUSG00000036053.17	Fmnl2	formin-like 2	207.718	2.10787	0.138533	6.15549e-53	3.60096e-51
ENSMUSG00000029765.12	Plxna4	plexin A4	14.6293	2.10605	0.656561	2.64088e-05	0.000148966
ENSMUSG00000107622.1	4930512J16Rik	RIKEN cDNA 4930512J16 gene	73.591	2.09774	0.229126	1.19775e-20	2.47183e-19
ENSMUSG00000022994.9	Adcy6	adenylate cyclase 6	397.98	2.09771	0.0982925	1.05554e-101	1.34332e-99
ENSMUSG00000046971.7	Pla2g4f	phospholipase A2, group IVF	13.317	2.09299	0.661681	2.90438e-05	0.000162589
ENSMUSG00000021411.16	Pxdc1	PX domain containing 1	21.0425	2.08484	0.451936	4.98667e-07	3.65203e-06
ENSMUSG00000031779.3	Ccl22	chemokine (C-C motif) ligand 22	3073.24	2.08435	0.0387742	0	0
ENSMUSG00000028100.11	Nudt17	nudix (nucleoside diphosphate linked moiety X)-type motif 17	43.9858	2.07454	0.304103	1.99004e-12	2.50391e-11
ENSMUSG00000058435.6	Btnl4	butyrophilin-like 4	133.555	2.07427	0.170359	9.72979e-35	3.47684e-33
ENSMUSG00000019966.18	Kitl	kit ligand	88.4152	2.07178	0.205139	1.29146e-24	3.18647e-23
ENSMUSG00000044827.10	Tlr1	toll-like receptor 1	33.0054	2.06533	0.341937	3.29033e-10	3.41705e-09
ENSMUSG00000058056.16	Palld	palladin, cytoskeletal associated protein	83.0864	2.06408	0.212196	5.42034e-23	1.26428e-21
ENSMUSG00000025727.8	A930017K11Rik	RIKEN cDNA A930017K11 gene	67.0921	2.06294	0.250375	4.02616e-17	6.929e-16
ENSMUSG00000034361.10	Cpne2	copine II	174.808	2.05837	0.150927	5.69611e-43	2.55059e-41
ENSMUSG00000028051.10	Hcn3	hyperpolarization-activated, cyclic nucleotide-gated K+ 3	16.1344	2.05354	0.604549	1.82019e-05	0.000106272
ENSMUSG00000028278.14	Rragd	Ras-related GTP binding D	173.709	2.04572	0.147577	2.63786e-44	1.20726e-42
ENSMUSG00000004633.17	Chn2	chimerin 2	24.9953	2.04549	0.417697	1.5469e-07	1.20658e-06
ENSMUSG00000024397.14	Aif1	allograft inflammatory factor 1	46.4712	2.04154	0.273576	2.01945e-14	2.95643e-13
ENSMUSG00000040405.13	Havcr1	hepatitis A virus cellular receptor 1	20.7272	2.0371	0.404393	8.15849e-08	6.55027e-07
ENSMUSG00000068263.11	Efcc1	EF hand and coiled-coil domain containing 1	8.50963	2.03652	0.916257	0.000159023	0.000768012
ENSMUSG00000047496.6	Rnf152	ring finger protein 152	11.3232	2.02425	0.750194	7.13099e-05	0.000369487
ENSMUSG00000037940.17	Inpp4b	inositol polyphosphate-4-phosphatase, type II	21.8136	2.02192	0.418077	2.06498e-07	1.58428e-06
ENSMUSG00000024940.11	Ltbp3	latent transforming growth factor beta binding protein 3	160.37	2.02021	0.148979	1.7572e-42	7.74879e-41
ENSMUSG00000114185.1	NA	NA	7.92838	2.01936	1.02169	0.000239074	0.00111276
ENSMUSG00000040026.8	Saa3	serum amyloid A 3	10.1122	2.00823	0.837557	0.000120785	0.000595834
ENSMUSG00000044103.4	Il1f9	interleukin 1 family, member 9	183.778	2.00469	0.270967	3.46668e-14	4.98955e-13
ENSMUSG00000037999.13	Arap2	ArfGAP with RhoGAP domain, ankyrin repeat and PH domain 2	76.2913	2.00411	0.229499	6.40224e-19	1.23516e-17
ENSMUSG00000038143.16	Stox2	storkhead box 2	10.6714	1.99284	0.695329	5.33607e-05	0.000284303
ENSMUSG00000096971.2	4930556M19Rik	RIKEN cDNA 4930556M19 gene	6.16247	1.98783	1.4033	0.000557128	0.0023745
ENSMUSG00000017493.12	Igfbp4	insulin-like growth factor binding protein 4	21.5468	1.98222	0.478096	2.72022e-06	1.80866e-05
ENSMUSG00000022037.15	Clu	clusterin	27.8403	1.97538	0.375237	2.84112e-08	2.41188e-07
ENSMUSG00000026479.13	Lamc2	laminin, gamma 2	11.3286	1.96913	0.691094	5.55133e-05	0.000294582
ENSMUSG00000044986.10	Tst	thiosulfate sulfurtransferase, mitochondrial	106.069	1.96625	0.181078	5.02115e-28	1.4009e-26
ENSMUSG00000070304.12	Scn2b	sodium channel, voltage-gated, type II, beta	9.44753	1.96381	0.785718	0.000103763	0.000519278
ENSMUSG00000026581.14	Sell	selectin, lymphocyte	124.5	1.95316	0.372594	3.24063e-08	2.73026e-07
ENSMUSG00000045092.8	S1pr1	sphingosine-1-phosphate receptor 1	56.0143	1.95084	0.286035	2.41229e-12	3.01963e-11
ENSMUSG00000079481.11	Nhsl2	NHS-like 2	26.9585	1.95055	0.415984	4.01059e-07	2.96563e-06
ENSMUSG00000021384.14	Susd3	sushi domain containing 3	44.6647	1.94774	0.306498	5.38081e-11	6.03283e-10
ENSMUSG00000020592.14	Sdc1	syndecan 1	25.2911	1.9434	0.416902	4.49315e-07	3.30561e-06
ENSMUSG00000048217.11	Nags	N-acetylglutamate synthase	6.19517	1.93681	1.18764	0.000434045	0.00190188
ENSMUSG00000092618.2	Btnl6	butyrophilin-like 6	236.324	1.92911	0.116469	3.80247e-62	2.70422e-60
ENSMUSG00000022018.7	Rgcc	regulator of cell cycle	1593.42	1.9269	0.0517427	4.5825e-304	2.77012e-301
ENSMUSG00000074570.14	Cass4	Cas scaffolding protein family member 4	77.9561	1.91263	0.298625	4.07055e-11	4.59577e-10
ENSMUSG00000020717.19	Pecam1	platelet/endothelial cell adhesion molecule 1	22.1452	1.91036	0.537743	1.33364e-05	7.9623e-05
ENSMUSG00000037172.14	E330009J07Rik	RIKEN cDNA E330009J07 gene	275.978	1.90721	0.113065	2.36088e-64	1.74753e-62
ENSMUSG00000033730.4	Egr3	early growth response 3	132.949	1.90262	0.190861	6.33482e-24	1.5141e-22
ENSMUSG00000019558.14	Slc6a8	solute carrier family 6 (neurotransmitter transporter, creatine), member 8	633.026	1.89534	0.0814631	3.04629e-120	4.91062e-118
ENSMUSG00000038418.7	Egr1	early growth response 1	2620.08	1.8932	0.0386113	0	0
ENSMUSG00000090307.7	1700071M16Rik	RIKEN cDNA 1700071M16 gene	8.7716	1.88263	1.20686	0.000504767	0.00217369
ENSMUSG00000028713.17	Cyp4b1	cytochrome P450, family 4, subfamily b, polypeptide 1	12.3283	1.88031	0.598845	3.24653e-05	0.000180186
ENSMUSG00000013483.14	Card14	caspase recruitment domain family, member 14	24.1369	1.87824	0.388384	2.23801e-07	1.708e-06
ENSMUSG00000035385.5	Ccl2	chemokine (C-C motif) ligand 2	277.726	1.87732	0.114455	5.88305e-61	4.10343e-59
ENSMUSG00000020865.16	Abcc3	ATP-binding cassette, sub-family C (CFTR/MRP), member 3	176.51	1.87399	0.152315	2.77122e-35	1.01527e-33
ENSMUSG00000071042.12	Rasgrp3	RAS, guanyl releasing protein 3	51.414	1.87083	0.266384	6.45036e-13	8.4843e-12
ENSMUSG00000085498.1	Gm14023	predicted gene 14023	36.7363	1.86677	0.321563	1.66507e-09	1.61153e-08
ENSMUSG00000048480.5	Cxcr1	chemokine (C-X-C motif) receptor 1	1995.54	1.86593	0.0421657	0	0
ENSMUSG00000021298.8	Gpr132	G protein-coupled receptor 132	225.877	1.86511	0.134066	1.73857e-44	7.98201e-43
ENSMUSG00000050640.16	Tmem150c	transmembrane protein 150C	26.8334	1.85689	0.374836	1.34502e-07	1.0565e-06
ENSMUSG00000040723.14	Rcsd1	RCSD domain containing 1	160.876	1.85299	0.165895	1.87768e-29	5.54814e-28
ENSMUSG00000011382.8	Dhdh	dihydrodiol dehydrogenase (dimeric)	74.2764	1.84736	0.230216	3.24363e-16	5.37198e-15
ENSMUSG00000028927.6	Padi2	peptidyl arginine deiminase, type II	52.9404	1.84561	0.270918	2.89347e-12	3.59097e-11
ENSMUSG00000041180.13	Hectd2	HECT domain E3 ubiquitin protein ligase 2	11.6384	1.84367	0.619194	4.4925e-05	0.00024338
ENSMUSG00000016128.14	Stard13	StAR-related lipid transfer (START) domain containing 13	20.8828	1.84317	0.441186	2.51327e-06	1.68185e-05
ENSMUSG00000028965.13	Tnfrsf9	tumor necrosis factor receptor superfamily, member 9	120.462	1.83856	0.174314	1.73785e-26	4.57582e-25
ENSMUSG00000025964.15	Adam23	a disintegrin and metallopeptidase domain 23	191.652	1.83306	0.136349	1.13188e-41	4.87279e-40
ENSMUSG00000028362.2	Tnfsf8	tumor necrosis factor (ligand) superfamily, member 8	32.8635	1.82952	0.344	2.3822e-08	2.0402e-07
ENSMUSG00000102895.1	NA	NA	58.5217	1.82581	0.256942	3.75542e-13	5.02153e-12
ENSMUSG00000047712.8	Ust	uronyl-2-sulfotransferase	27.0906	1.82346	0.427474	1.89954e-06	1.29322e-05
ENSMUSG00000102715.1	NA	NA	100.497	1.8232	0.188977	1.69433e-22	3.84685e-21
ENSMUSG00000052336.7	Cx3cr1	chemokine (C-X3-C motif) receptor 1	151.354	1.82151	0.162599	1.35396e-29	4.05014e-28
ENSMUSG00000035164.8	Zc3h12c	zinc finger CCCH type containing 12C	214.205	1.81924	0.128143	3.30921e-46	1.63299e-44
ENSMUSG00000034265.8	Zdhhc14	zinc finger, DHHC domain containing 14	65.857	1.81319	0.228054	6.13385e-16	9.85492e-15
ENSMUSG00000029608.10	Rph3a	rabphilin 3A	61.1162	1.80662	0.235767	6.00174e-15	9.10808e-14
ENSMUSG00000070691.10	Runx3	runt related transcription factor 3	133.439	1.80601	0.161262	1.43339e-29	4.27893e-28
ENSMUSG00000067219.9	Nipal1	NIPA-like domain containing 1	13.4622	1.80585	0.675478	8.01025e-05	0.000410791
ENSMUSG00000001763.14	Tspan33	tetraspanin 33	56.6925	1.80535	0.241074	2.27857e-14	3.31569e-13
ENSMUSG00000054342.8	Kcnn4	potassium intermediate/small conductance calcium-activated channel, subfamily N, member 4	180.934	1.80227	0.151579	4.68931e-33	1.55325e-31
ENSMUSG00000115946.2	NA	NA	13.8407	1.80114	1.69889	0.000951431	0.00383427
ENSMUSG00000025278.9	Flnb	filamin, beta	153.663	1.79975	0.149237	6.08216e-34	2.10095e-32
ENSMUSG00000022148.16	Fyb	FYN binding protein	131.526	1.79888	0.186143	1.49185e-22	3.40847e-21
ENSMUSG00000023903.8	Mmp25	matrix metallopeptidase 25	293.819	1.79192	0.112872	3.36212e-57	2.17758e-55
ENSMUSG00000027931.12	Npr1	natriuretic peptide receptor 1	292.535	1.79138	0.111109	6.35177e-59	4.34677e-57
ENSMUSG00000032845.16	Alpk2	alpha-kinase 2	19.802	1.78897	0.501037	1.27413e-05	7.63217e-05
ENSMUSG00000031780.2	Ccl17	chemokine (C-C motif) ligand 17	1261.74	1.7663	0.0601245	3.99626e-190	1.26039e-187
ENSMUSG00000039735.16	Fnbp1l	formin binding protein 1-like	294.043	1.76129	0.110224	6.68358e-58	4.42764e-56
ENSMUSG00000039716.12	Dock3	dedicator of cyto-kinesis 3	62.6392	1.76114	0.239503	6.57192e-14	9.29293e-13
ENSMUSG00000002489.16	Tiam1	T cell lymphoma invasion and metastasis 1	143.793	1.74997	0.15537	7.4578e-30	2.25412e-28
ENSMUSG00000035352.3	Ccl12	chemokine (C-C motif) ligand 12	13.6757	1.74891	0.84581	0.000239783	0.0011153
ENSMUSG00000022098.10	Bmp1	bone morphogenetic protein 1	8.01287	1.7467	1.23052	0.000700126	0.00291629
ENSMUSG00000039899.5	Fgl2	fibrinogen-like protein 2	719.852	1.74477	0.0765988	2.90956e-115	4.49063e-113
ENSMUSG00000110386.1	NA	NA	73.7589	1.74374	0.263536	1.18562e-11	1.40073e-10
ENSMUSG00000043740.15	B430306N03Rik	RIKEN cDNA B430306N03 gene	413.653	1.74343	0.0924282	8.90258e-80	8.38692e-78
ENSMUSG00000036206.12	Sh3bp4	SH3-domain binding protein 4	103.292	1.73734	0.184243	1.53244e-21	3.29862e-20
ENSMUSG00000029380.11	Cxcl1	chemokine (C-X-C motif) ligand 1	768.871	1.73025	0.0658384	1.26272e-152	2.8184e-150
ENSMUSG00000045065.7	NA	NA	15.2797	1.72168	0.606933	5.9233e-05	0.000312492
ENSMUSG00000039062.15	Anpep	alanyl (membrane) aminopeptidase	2155.36	1.71751	0.0393713	0	0
ENSMUSG00000054404.13	Slfn5	schlafen 5	276.209	1.7132	0.11419	2.77612e-51	1.57328e-49
ENSMUSG00000066456.14	Hmgn3	high mobility group nucleosomal binding domain 3	18.4884	1.71285	0.476456	1.17513e-05	7.05951e-05
ENSMUSG00000044162.12	Tnip3	TNFAIP3 interacting protein 3	164.927	1.70448	0.142667	2.65345e-33	8.91116e-32
ENSMUSG00000042842.11	Serpinb6b	serine (or cysteine) peptidase inhibitor, clade B, member 6b	259.364	1.70395	0.114559	1.94505e-50	1.05688e-48
ENSMUSG00000021087.18	Rtn1	reticulon 1	22.3354	1.70045	0.401629	2.01062e-06	1.35964e-05
ENSMUSG00000104164.1	NA	NA	55.1922	1.70009	0.260268	2.11532e-11	2.4473e-10
ENSMUSG00000049001.5	Ndnf	neuron-derived neurotrophic factor	21.4281	1.69965	0.471389	1.13881e-05	6.85555e-05
ENSMUSG00000039629.14	Strip2	striatin interacting protein 2	296.766	1.69656	0.108419	1.38193e-55	8.64184e-54
ENSMUSG00000025746.11	Il6	interleukin 6	34.3669	1.69541	0.316042	1.90971e-08	1.65904e-07
ENSMUSG00000038807.19	Rap1gap2	RAP1 GTPase activating protein 2	59.3783	1.69527	0.263187	3.81469e-11	4.32841e-10
ENSMUSG00000027068.6	Dhrs9	dehydrogenase/reductase (SDR family) member 9	57.6595	1.6939	0.295612	2.73606e-09	2.59443e-08
ENSMUSG00000024044.19	Epb41l3	erythrocyte membrane protein band 4.1 like 3	11.3364	1.68748	0.931169	0.000385183	0.0017079
ENSMUSG00000053318.7	Slamf8	SLAM family member 8	61.0205	1.68413	0.227294	4.57849e-14	6.55723e-13
ENSMUSG00000025473.16	Adam8	a disintegrin and metallopeptidase domain 8	554.891	1.6841	0.0854368	7.0619e-87	7.26624e-85
ENSMUSG00000090675.2	Olfr111	olfactory receptor 111	45.8627	1.68382	0.282573	7.40692e-10	7.42125e-09
ENSMUSG00000051212.8	Gpr183	G protein-coupled receptor 183	90.9472	1.68316	0.204208	6.4015e-17	1.09262e-15
ENSMUSG00000032324.11	Tspan3	tetraspanin 3	317.541	1.67895	0.104375	1.32559e-58	8.90354e-57
ENSMUSG00000067341.6	H2-Eb2	histocompatibility 2, class II antigen E beta2	102.406	1.67509	0.178179	2.13477e-21	4.56804e-20
ENSMUSG00000021701.8	Plk2	polo like kinase 2	406.834	1.66958	0.0956828	1.46047e-68	1.14533e-66
ENSMUSG00000092060.4	Bend4	BEN domain containing 4	44.3879	1.66148	0.31249	2.39233e-08	2.04646e-07
ENSMUSG00000045672.15	Col27a1	collagen, type XXVII, alpha 1	81.0218	1.65434	0.197818	2.37792e-17	4.13656e-16
ENSMUSG00000055407.14	Map6	microtubule-associated protein 6	293.407	1.64921	0.109898	2.81933e-51	1.59155e-49
ENSMUSG00000018920.11	Cxcl16	chemokine (C-X-C motif) ligand 16	1200.16	1.64471	0.0559815	4.34506e-190	1.34124e-187
ENSMUSG00000090176.1	Cd200r2	Cd200 receptor 2	223.268	1.63491	0.119398	4.79647e-43	2.16109e-41
ENSMUSG00000030283.7	St8sia1	ST8 alpha-N-acetyl-neuraminide alpha-2,8-sialyltransferase 1	12.7079	1.63223	0.772665	0.000230196	0.00107593
ENSMUSG00000035678.8	Tnfsf9	tumor necrosis factor (ligand) superfamily, member 9	28.5326	1.63189	0.371413	1.12455e-06	7.88162e-06
ENSMUSG00000104068.1	NA	NA	31.4806	1.63101	0.362431	7.73162e-07	5.52835e-06
ENSMUSG00000049580.12	Tsku	tsukushi, small leucine rich proteoglycan	184.42	1.61011	0.136624	2.01616e-32	6.58793e-31
ENSMUSG00000029919.5	Hpgds	hematopoietic prostaglandin D synthase	343.611	1.60643	0.102866	2.48283e-55	1.54596e-53
ENSMUSG00000028970.9	Abcb1b	ATP-binding cassette, sub-family B (MDR/TAP), member 1B	77.4983	1.59867	0.212011	1.75951e-14	2.58371e-13
ENSMUSG00000004151.17	Etv1	ets variant 1	14.1787	1.59549	0.661135	0.000131884	0.000645535
ENSMUSG00000015305.6	Sash1	SAM and SH3 domain containing 1	297.153	1.59211	0.116011	3.25767e-43	1.47234e-41
ENSMUSG00000026875.14	Traf1	TNF receptor-associated factor 1	441.386	1.59028	0.0912938	2.65779e-68	2.07308e-66
ENSMUSG00000028459.11	Cd72	CD72 antigen	49.4503	1.5846	0.263873	5.47083e-10	5.56207e-09
ENSMUSG00000021118.7	Plek2	pleckstrin 2	21.4863	1.5834	0.388525	2.95301e-06	1.95092e-05
ENSMUSG00000040829.14	Zmynd15	zinc finger, MYND-type containing 15	288.71	1.57918	0.10779	6.0375e-49	3.15079e-47
ENSMUSG00000014602.15	Kif1a	kinesin family member 1A	261.812	1.55946	0.119415	2.5537e-39	1.04658e-37
ENSMUSG00000051379.12	Flrt3	fibronectin leucine rich transmembrane protein 3	94.1828	1.5594	0.194854	4.75677e-16	7.75408e-15
ENSMUSG00000049871.14	Nlrc3	NLR family, CARD domain containing 3	76.8805	1.54408	0.216927	3.8725e-13	5.16855e-12
ENSMUSG00000074472.10	Zfp872	zinc finger protein 872	6.9309	1.54282	1.03847	0.000743605	0.00307357
ENSMUSG00000055632.18	Hmcn2	hemicentin 2	10.6912	1.54193	0.832834	0.00038246	0.00169738
ENSMUSG00000022475.19	Hdac7	histone deacetylase 7	25.4806	1.5414	0.511929	3.9361e-05	0.000215247
ENSMUSG00000015980.14	Lrrc27	leucine rich repeat containing 27	291.916	1.5411	0.108687	5.68991e-46	2.77011e-44
ENSMUSG00000074063.10	Osgin1	oxidative stress induced growth inhibitor 1	184.219	1.5407	0.168906	3.10341e-20	6.26207e-19
ENSMUSG00000062157.6	Ifnlr1	interferon lambda receptor 1	87.2158	1.53246	0.194082	1.11098e-15	1.75388e-14
ENSMUSG00000043263.13	Ifi209	interferon activated gene 209	127.67	1.52905	0.165321	9.56204e-21	1.97616e-19
ENSMUSG00000027932.14	Slc27a3	solute carrier family 27 (fatty acid transporter), member 3	211.774	1.52717	0.132542	4.59894e-31	1.43487e-29
ENSMUSG00000020422.14	Tns3	tensin 3	484.168	1.51972	0.0839302	1.33565e-73	1.1744e-71
ENSMUSG00000022602.14	Arc	activity regulated cytoskeletal-associated protein	101.046	1.51655	0.21136	2.53039e-13	3.42453e-12
ENSMUSG00000030365.11	Clec2i	C-type lectin domain family 2, member i	40.7022	1.51243	0.292738	4.19767e-08	3.48996e-07
ENSMUSG00000013584.5	Aldh1a2	aldehyde dehydrogenase family 1, subfamily A2	770.601	1.50658	0.0652809	3.68929e-118	5.88178e-116
ENSMUSG00000046997.5	Spsb4	splA/ryanodine receptor domain and SOCS box containing 4	20.2969	1.50535	0.50933	4.32361e-05	0.000235021
ENSMUSG00000028517.8	Plpp3	phospholipid phosphatase 3	818.319	1.50485	0.0654514	2.72793e-117	4.30183e-115
ENSMUSG00000097077.1	Gm16712	predicted gene, 16712	16.2296	1.50433	0.675811	0.000187982	0.000893592
ENSMUSG00000048826.7	Dact2	dishevelled-binding antagonist of beta-catenin 2	75.3517	1.49907	0.19174	2.01371e-15	3.14139e-14
ENSMUSG00000059994.10	Fcrl1	Fc receptor-like 1	13.0633	1.497	0.724341	0.000256072	0.00118165
ENSMUSG00000004296.14	Il12b	interleukin 12b	191.165	1.49688	0.140496	7.38814e-27	1.96314e-25
ENSMUSG00000022440.9	C1qtnf6	C1q and tumor necrosis factor related protein 6	5.68762	1.49671	1.27748	0.00127977	0.00496574
ENSMUSG00000055435.6	Maf	avian musculoaponeurotic fibrosarcoma oncogene homolog	89.2016	1.4962	0.206125	1.36282e-13	1.88124e-12
ENSMUSG00000062098.11	Btbd3	BTB (POZ) domain containing 3	20.3513	1.48761	0.496363	3.90638e-05	0.0002138
ENSMUSG00000066278.6	Vps37b	vacuolar protein sorting 37B	78.2402	1.48721	0.214888	1.46333e-12	1.86228e-11
ENSMUSG00000066191.12	Anks6	ankyrin repeat and sterile alpha motif domain containing 6	8.11636	1.48286	1.48216	0.00156699	0.00595441
ENSMUSG00000038264.8	Sema7a	sema domain, immunoglobulin domain (Ig), and GPI membrane anchor, (semaphorin) 7A	106.366	1.48234	0.176198	1.57363e-17	2.78758e-16
ENSMUSG00000033066.15	Gas7	growth arrest specific 7	399.645	1.48136	0.101002	4.99282e-49	2.61501e-47
ENSMUSG00000014932.15	Yes1	YES proto-oncogene 1, Src family tyrosine kinase	41.6004	1.48048	0.344604	1.26689e-06	8.84505e-06
ENSMUSG00000032216.15	Nedd4	neural precursor cell expressed, developmentally down-regulated 4	15.4832	1.4802	0.634128	0.000151455	0.000734886
ENSMUSG00000069805.10	Fbp1	fructose bisphosphatase 1	124.212	1.478	0.183448	2.97025e-16	4.94178e-15
ENSMUSG00000031995.9	St14	suppression of tumorigenicity 14 (colon carcinoma)	70.6204	1.46845	0.217839	4.81686e-12	5.84306e-11
ENSMUSG00000004952.13	Rasa4	RAS p21 protein activator 4	709.217	1.46674	0.0709753	3.4687e-95	4.05838e-93
ENSMUSG00000023079.14	Gtf2ird1	general transcription factor II I repeat domain-containing 1	37.1392	1.46512	0.331871	8.2065e-07	5.84487e-06
ENSMUSG00000021356.10	Irf4	interferon regulatory factor 4	397.475	1.45708	0.0903082	6.99708e-59	4.74363e-57
ENSMUSG00000074305.9	Peak1	pseudopodium-enriched atypical kinase 1	150.063	1.45354	0.164709	4.35181e-19	8.46328e-18
ENSMUSG00000032666.16	1700025G04Rik	RIKEN cDNA 1700025G04 gene	49.4732	1.45185	0.249921	1.39525e-09	1.35946e-08
ENSMUSG00000026358.13	Rgs1	regulator of G-protein signaling 1	5298.74	1.44607	0.0286022	0	0
ENSMUSG00000044349.16	Snhg11	small nucleolar RNA host gene 11	115.292	1.44532	0.167643	2.56311e-18	4.77351e-17
ENSMUSG00000041552.7	Ptchd1	patched domain containing 1	28.8251	1.44477	0.374785	4.57721e-06	2.94354e-05
ENSMUSG00000093661.1	Eif4e3	eukaryotic translation initiation factor 4E member 3	138.662	1.44029	0.152559	1.51341e-21	3.26735e-20
ENSMUSG00000038267.15	Slc22a23	solute carrier family 22, member 23	84.5677	1.43503	0.21038	2.66074e-12	3.31633e-11
ENSMUSG00000099375.1	NA	NA	18.5818	1.43478	0.531563	7.06842e-05	0.000366638
ENSMUSG00000040710.10	St8sia4	ST8 alpha-N-acetyl-neuraminide alpha-2,8-sialyltransferase 4	424.866	1.43172	0.0923286	1.48381e-54	9.0832e-53
ENSMUSG00000027737.10	Slc7a11	solute carrier family 7 (cationic amino acid transporter, y+ system), member 11	1191.61	1.43165	0.0598137	6.51833e-127	1.13937e-124
ENSMUSG00000045404.16	Kcnk13	potassium channel, subfamily K, member 13	65.785	1.42877	0.229472	1.18015e-10	1.2806e-09
ENSMUSG00000032322.14	Pstpip1	proline-serine-threonine phosphatase-interacting protein 1	181.817	1.42877	0.149474	4.86353e-22	1.07397e-20
ENSMUSG00000035356.17	Nfkbiz	nuclear factor of kappa light polypeptide gene enhancer in B cells inhibitor, zeta	1066.8	1.42758	0.0580704	9.36828e-134	1.86185e-131
ENSMUSG00000032076.20	Cadm1	cell adhesion molecule 1	119.691	1.42731	0.17658	2.26164e-16	3.78452e-15
ENSMUSG00000030465.19	Psd3	pleckstrin and Sec7 domain containing 3	172.384	1.42283	0.136513	8.28828e-26	2.12825e-24
ENSMUSG00000086196.7	NA	NA	203.711	1.41774	0.123018	4.35936e-31	1.36599e-29
ENSMUSG00000038390.11	Gpr162	G protein-coupled receptor 162	74.4633	1.41684	0.215792	1.37844e-11	1.62325e-10
ENSMUSG00000020334.6	Slc22a4	solute carrier family 22 (organic cation transporter), member 4	76.6711	1.41579	0.21674	1.70582e-11	1.98461e-10
ENSMUSG00000046463.5	NA	NA	7.16719	1.41487	1.17964	0.00133832	0.00516941
ENSMUSG00000019699.16	Akt3	thymoma viral proto-oncogene 3	203.806	1.41364	0.132398	5.52686e-27	1.4794e-25
ENSMUSG00000115148.1	NA	NA	116.836	1.41276	0.177262	5.47596e-16	8.83707e-15
ENSMUSG00000090582.1	NA	NA	101.211	1.41024	0.17161	7.34332e-17	1.24751e-15
ENSMUSG00000000982.5	Ccl3	chemokine (C-C motif) ligand 3	2477.74	1.40629	0.0387548	1.30416e-288	6.52439e-286
ENSMUSG00000026073.13	Il1r2	interleukin 1 receptor, type II	215.544	1.40355	0.215292	1.7996e-11	2.09036e-10
ENSMUSG00000013033.16	Adgrl1	adhesion G protein-coupled receptor L1	12.3153	1.39865	0.842459	0.000578863	0.00246063
ENSMUSG00000039057.11	Myo16	myosin XVI	7.18058	1.3983	1.10598	0.00122174	0.00476862
ENSMUSG00000034220.7	Gpc1	glypican 1	44.7518	1.39408	0.312117	5.80397e-07	4.2102e-06
ENSMUSG00000027219.13	Slc28a2	solute carrier family 28 (sodium-coupled nucleoside transporter), member 2	13.6182	1.37746	1.02611	0.00108132	0.00428745
ENSMUSG00000035513.19	Ntng2	netrin G2	53.1672	1.37683	0.295756	2.72251e-07	2.05612e-06
ENSMUSG00000050919.9	Zfp366	zinc finger protein 366	103.15	1.37484	0.180089	6.86748e-15	1.03785e-13
ENSMUSG00000003355.7	Fkbp11	FK506 binding protein 11	142.924	1.37289	0.162691	1.08169e-17	1.94705e-16
ENSMUSG00000045322.10	Tlr9	toll-like receptor 9	51.1793	1.37176	0.29213	2.28836e-07	1.74184e-06
ENSMUSG00000052889.11	Prkcb	protein kinase C, beta	264.521	1.36841	0.110431	1.23598e-35	4.5861e-34
ENSMUSG00000024486.6	Hbegf	heparin-binding EGF-like growth factor	20.6615	1.36672	0.690776	0.000304681	0.00138264
ENSMUSG00000026357.3	Rgs18	regulator of G-protein signaling 18	26.8565	1.36669	0.434549	2.46641e-05	0.000140214
ENSMUSG00000021136.13	Smoc1	SPARC related modular calcium binding 1	74.5416	1.35664	0.213538	4.47031e-11	5.03144e-10
ENSMUSG00000002059.18	Rab34	RAB34, member RAS oncogene family	148.649	1.3517	0.145848	6.62361e-21	1.38068e-19
ENSMUSG00000020641.16	Rsad2	radical S-adenosyl methionine domain containing 2	140.93	1.35114	0.164387	6.35262e-17	1.08556e-15
ENSMUSG00000021322.8	Aoah	acyloxyacyl hydrolase	216.081	1.35008	0.120535	1.59406e-29	4.73905e-28
ENSMUSG00000069873.4	4930438A08Rik	RIKEN cDNA 4930438A08 gene	6.73073	1.34297	1.22102	0.00167987	0.00633356
ENSMUSG00000029101.16	Rgs12	regulator of G-protein signaling 12	62.9251	1.33999	0.235017	1.83371e-09	1.76884e-08
ENSMUSG00000026121.13	Sema4c	sema domain, immunoglobulin domain (Ig), transmembrane domain (TM) and short cytoplasmic domain, (semaphorin) 4C	44.8833	1.3387	0.286468	2.26232e-07	1.72383e-06
ENSMUSG00000044468.14	Tent5c	terminal nucleotidyltransferase 5C	314.32	1.33634	0.104203	4.87134e-38	1.91009e-36
ENSMUSG00000084834.1	4930565N06Rik	RIKEN cDNA 4930565N06 gene	18.0082	1.33023	0.69584	0.000348979	0.00156265
ENSMUSG00000028245.15	Nsmaf	neutral sphingomyelinase (N-SMase) activation associated factor	137.042	1.32871	0.158653	1.63713e-17	2.88596e-16
ENSMUSG00000004933.17	Matk	megakaryocyte-associated tyrosine kinase	154.307	1.32859	0.153012	1.18793e-18	2.26472e-17
ENSMUSG00000032726.12	Bmp8a	bone morphogenetic protein 8a	7.03253	1.32082	1.05179	0.00132421	0.00512448
ENSMUSG00000039908.14	Slc26a11	solute carrier family 26, member 11	72.7088	1.31811	0.244898	8.84535e-09	7.96576e-08
ENSMUSG00000009376.15	Met	met proto-oncogene	51.9068	1.31518	0.262752	5.16319e-08	4.23446e-07
ENSMUSG00000032724.5	Abtb2	ankyrin repeat and BTB (POZ) domain containing 2	173.925	1.3125	0.139758	1.87053e-21	4.01445e-20
ENSMUSG00000026068.11	Il18rap	interleukin 18 receptor accessory protein	150.088	1.31139	0.16515	5.26729e-16	8.52878e-15
ENSMUSG00000024672.11	Ms4a7	membrane-spanning 4-domains, subfamily A, member 7	408.571	1.30458	0.0944101	7.66725e-44	3.48703e-42
ENSMUSG00000039372.5	2020-03-04	membrane-associated ring finger (C3HC4) 4	399.624	1.30354	0.0871281	5.2252e-51	2.91566e-49
ENSMUSG00000023830.14	Igf2r	insulin-like growth factor 2 receptor	592.706	1.30313	0.0745835	9.65223e-69	7.61057e-67
ENSMUSG00000009681.10	Bcr	breakpoint cluster region	43.0506	1.30297	0.301551	7.50572e-07	5.38009e-06
ENSMUSG00000075254.12	Heg1	heart development protein with EGF-like domains 1	25.4295	1.3001	0.446285	3.8641e-05	0.000211709
ENSMUSG00000097125.2	NA	NA	20.0398	1.29825	0.580508	0.000173194	0.000829274
ENSMUSG00000027583.13	Zbtb46	zinc finger and BTB domain containing 46	176.541	1.29136	0.135789	5.64651e-22	1.23933e-20
ENSMUSG00000026640.12	Plxna2	plexin A2	118.418	1.29104	0.175627	4.25365e-14	6.09802e-13
ENSMUSG00000031565.18	Fgfr1	fibroblast growth factor receptor 1	132.327	1.28669	0.160921	3.08664e-16	5.11782e-15
ENSMUSG00000078817.4	Nlrp12	NLR family, pyrin domain containing 12	17.0142	1.28571	1.54066	0.00228106	0.00830873
ENSMUSG00000103593.1	NA	NA	113.055	1.28426	0.161501	4.32421e-16	7.08877e-15
ENSMUSG00000023045.13	Soat2	sterol O-acyltransferase 2	55.3635	1.2833	0.298451	7.58311e-07	5.43288e-06
ENSMUSG00000038692.8	Hoxb4	homeobox B4	23.6451	1.27896	0.438309	3.71111e-05	0.000203865
ENSMUSG00000027435.8	Cd93	CD93 antigen	1862.46	1.27881	0.0433375	9.42219e-192	3.03771e-189
ENSMUSG00000022661.14	Cd200	CD200 antigen	1697.97	1.27446	0.0460466	5.3033e-169	1.39891e-166
ENSMUSG00000032470.17	Mras	muscle and microspikes RAS	64.7989	1.27103	0.24315	1.55581e-08	1.37048e-07
ENSMUSG00000004631.15	Sgce	sarcoglycan, epsilon	7.30439	1.27054	1.54556	0.00234035	0.00848633
ENSMUSG00000021451.16	Sema4d	sema domain, immunoglobulin domain (Ig), transmembrane domain (TM) and short cytoplasmic domain, (semaphorin) 4D	865.455	1.26592	0.0619279	2.71252e-93	3.05064e-91
ENSMUSG00000003206.7	Ebi3	Epstein-Barr virus induced gene 3	73.2332	1.26472	0.218938	8.97894e-10	8.90407e-09
ENSMUSG00000116820.1	NA	NA	43.7559	1.26342	0.29016	5.84127e-07	4.23303e-06
ENSMUSG00000049313.8	Sorl1	sortilin-related receptor, LDLR class A repeats-containing	429.226	1.26108	0.103866	2.00259e-34	7.05185e-33
ENSMUSG00000021127.7	Zfp36l1	zinc finger protein 36, C3H type-like 1	1297.03	1.26038	0.0525661	1.85293e-127	3.3188e-125
ENSMUSG00000026437.11	Cdk18	cyclin-dependent kinase 18	37.4238	1.25921	0.34226	5.03725e-06	3.21374e-05
ENSMUSG00000000386.16	Mx1	MX dynamin-like GTPase 1	117.269	1.25678	0.160284	9.11248e-16	1.44643e-14
ENSMUSG00000097742.1	NA	NA	6.28556	1.25517	1.32718	0.002283	0.00831371
ENSMUSG00000013076.17	Amotl1	angiomotin-like 1	50.846	1.255	0.28724	5.37015e-07	3.92099e-06
ENSMUSG00000045763.8	Basp1	brain abundant, membrane attached signal protein 1	919.397	1.25447	0.0586923	8.67965e-102	1.11437e-99
ENSMUSG00000059325.14	Hopx	HOP homeobox	154.72	1.25162	0.149501	1.2284e-17	2.20292e-16
ENSMUSG00000033033.10	Calhm2	calcium homeostasis modulator family member 2	39.1265	1.24444	0.338726	4.91858e-06	3.14633e-05
ENSMUSG00000046841.5	Ckap4	cytoskeleton-associated protein 4	118.02	1.24259	0.179808	7.48565e-13	9.77515e-12
ENSMUSG00000056529.7	Ptafr	platelet-activating factor receptor	901.375	1.24017	0.0622276	7.75886e-89	8.15692e-87
ENSMUSG00000072621.13	Slfn10-ps	schlafen 10, pseudogene	46.2015	1.23997	0.35534	8.15624e-06	5.03107e-05
ENSMUSG00000058427.10	Cxcl2	chemokine (C-X-C motif) ligand 2	7064.96	1.23496	0.0221698	0	0
ENSMUSG00000063727.3	Tnfrsf11b	tumor necrosis factor receptor superfamily, member 11b (osteoprotegerin)	7.65575	1.22972	0.898924	0.00112753	0.00443912
ENSMUSG00000105556.1	NA	NA	14.1785	1.22944	0.765273	0.000673506	0.00282079
ENSMUSG00000048126.16	Col6a3	collagen, type VI, alpha 3	89.1349	1.2248	0.178494	9.46629e-13	1.22186e-11
ENSMUSG00000051515.9	Fam181b	family with sequence similarity 181, member B	24.773	1.22211	0.468995	7.11707e-05	0.000368898
ENSMUSG00000025492.6	Ifitm3	interferon induced transmembrane protein 3	100.978	1.222	0.211068	6.77318e-10	6.83347e-09
ENSMUSG00000046834.7	Krt1	keratin 1	68.5587	1.22071	0.22151	2.993e-09	2.82514e-08
ENSMUSG00000004359.16	Spic	Spi-C transcription factor (Spi-1/PU.1 related)	17.0882	1.22016	0.590131	0.000241092	0.00112
ENSMUSG00000046186.8	Cd109	CD109 antigen	36.7707	1.2194	0.481153	8.36829e-05	0.000427791
ENSMUSG00000050921.12	P2ry10	purinergic receptor P2Y, G-protein coupled 10	243.986	1.21599	0.116365	3.31788e-26	8.62649e-25
ENSMUSG00000015745.9	Plekho1	pleckstrin homology domain containing, family O member 1	792.473	1.21547	0.0641176	1.17437e-80	1.12833e-78
ENSMUSG00000027562.12	Car2	carbonic anhydrase 2	14.5535	1.21149	0.656346	0.000395249	0.00174932
ENSMUSG00000003134.10	Tbc1d8	TBC1 domain family, member 8	442.331	1.20637	0.0836662	1.03373e-47	5.26222e-46
ENSMUSG00000026938.10	Fcna	ficolin A	31.3224	1.19745	0.404451	2.93679e-05	0.000164188
ENSMUSG00000043017.9	Ptgir	prostaglandin I receptor (IP)	1559.54	1.19581	0.0491177	1.83728e-131	3.55403e-129
ENSMUSG00000038168.5	P3h2	prolyl 3-hydroxylase 2	30.7733	1.19577	0.429704	4.5214e-05	0.000244581
ENSMUSG00000078982.3	NA	NA	20.3004	1.19451	0.615932	0.000318374	0.0014358
ENSMUSG00000024675.19	Ms4a4c	membrane-spanning 4-domains, subfamily A, member 4C	18.1802	1.19223	0.588571	0.000261412	0.00120437
ENSMUSG00000024589.18	Nedd4l	neural precursor cell expressed, developmentally down-regulated gene 4-like	107.206	1.19059	0.181071	5.12718e-12	6.2091e-11
ENSMUSG00000030785.8	Cox6a2	cytochrome c oxidase subunit 6A2	34.2785	1.18891	0.449281	6.20458e-05	0.000326145
ENSMUSG00000039395.8	Mreg	melanoregulin	944.97	1.18757	0.0590064	1.1434e-90	1.22877e-88
ENSMUSG00000029059.9	Prxl2b	peroxiredoxin like 2B	51.6196	1.18575	0.287438	9.83421e-07	6.93944e-06
ENSMUSG00000037366.14	Pafah2	platelet-activating factor acetylhydrolase 2	64.1358	1.18444	0.222875	6.70694e-09	6.11592e-08
ENSMUSG00000048534.7	Jaml	junction adhesion molecule like	144.067	1.18184	0.15	4.39836e-16	7.2022e-15
ENSMUSG00000020264.5	Slc36a2	solute carrier family 36 (proton/amino acid symporter), member 2	28.559	1.17905	0.429956	4.86023e-05	0.000261156
ENSMUSG00000044350.14	Lacc1	laccase domain containing 1	203.277	1.17387	0.125029	9.45276e-22	2.053e-20
ENSMUSG00000028862.6	Map3k6	mitogen-activated protein kinase kinase kinase 6	25.9806	1.17204	0.473977	9.15355e-05	0.000464335
ENSMUSG00000018930.3	Ccl4	chemokine (C-C motif) ligand 4	177.139	1.17058	0.191637	8.14752e-11	8.94132e-10
ENSMUSG00000043953.12	Ccrl2	chemokine (C-C motif) receptor-like 2	1922.05	1.16944	0.0413852	2.86158e-176	7.83317e-174
ENSMUSG00000035042.2	Ccl5	chemokine (C-C motif) ligand 5	145.169	1.16873	0.147636	3.00076e-16	4.98683e-15
ENSMUSG00000034751.17	Mast4	microtubule associated serine/threonine kinase family member 4	117.215	1.16419	0.173098	1.62558e-12	2.06153e-11
ENSMUSG00000000531.5	Grasp	GRP1 (general receptor for phosphoinositides 1)-associated scaffold protein	86.291	1.16066	0.200655	4.93314e-10	5.04369e-09
ENSMUSG00000022240.10	Ctnnd2	catenin (cadherin associated protein), delta 2	15.9394	1.158	0.664208	0.000493775	0.00213268
ENSMUSG00000026826.13	Nr4a2	nuclear receptor subfamily 4, group A, member 2	78.4895	1.15735	0.200722	5.355e-10	5.45579e-09
ENSMUSG00000021367.8	Edn1	endothelin 1	5.37013	1.15572	1.52895	0.00286614	0.0101419
ENSMUSG00000053004.9	Hrh1	histamine receptor H1	50.1885	1.15162	0.316327	4.14451e-06	2.68431e-05
ENSMUSG00000030825.19	Hsd17b14	hydroxysteroid (17-beta) dehydrogenase 14	22.7351	1.14621	0.481359	0.000110434	0.000548505
ENSMUSG00000109005.1	NA	NA	93.2705	1.1444	0.193007	1.96625e-10	2.08526e-09
ENSMUSG00000103509.1	NA	NA	32.1259	1.14236	0.421761	4.98443e-05	0.000267533
ENSMUSG00000043487.4	Acot6	acyl-CoA thioesterase 6	10.121	1.1363	0.910532	0.00153448	0.00584244
ENSMUSG00000025558.19	Dock9	dedicator of cytokinesis 9	48.4196	1.13297	0.300381	2.60252e-06	1.73597e-05
ENSMUSG00000069792.5	Wfdc17	WAP four-disulfide core domain 17	1862.42	1.13179	0.0481915	1.04128e-122	1.71669e-120
ENSMUSG00000023032.12	Slc4a8	solute carrier family 4 (anion exchanger), member 8	42.5948	1.12645	0.337473	9.2797e-06	5.6758e-05
ENSMUSG00000029438.9	Bcl7a	B cell CLL/lymphoma 7A	37.9752	1.12554	0.350219	1.30559e-05	7.81415e-05
ENSMUSG00000010051.15	Hyal1	hyaluronoglucosaminidase 1	24.8035	1.12066	0.518805	0.000182324	0.000868688
ENSMUSG00000045319.13	Proser2	proline and serine rich 2	9.73711	1.12055	0.810669	0.00114388	0.0044962
ENSMUSG00000030214.7	Plbd1	phospholipase B domain containing 1	569.604	1.12045	0.0767115	3.60905e-49	1.904e-47
ENSMUSG00000043822.18	Adamtsl5	ADAMTS-like 5	248.412	1.1194	0.108288	5.317e-26	1.37258e-24
ENSMUSG00000047945.6	Marcksl1	MARCKS-like 1	382.583	1.11639	0.108769	1.10497e-25	2.82234e-24
ENSMUSG00000030688.15	Stard10	START domain containing 10	25.1282	1.11617	0.489828	0.000136713	0.000667148
ENSMUSG00000117318.1	NA	NA	49.3489	1.11339	0.286054	1.6425e-06	1.12936e-05
ENSMUSG00000024042.7	Sik1	salt inducible kinase 1	471.601	1.11211	0.0902469	8.07283e-36	3.01857e-34
ENSMUSG00000027238.17	Frmd5	FERM domain containing 5	11.4619	1.11197	0.867209	0.00144183	0.00553096
ENSMUSG00000066687.5	Zbtb16	zinc finger and BTB domain containing 16	28.5077	1.1105	0.46775	0.000107924	0.000537507
ENSMUSG00000027339.15	Rassf2	Ras association (RalGDS/AF-6) domain family member 2	891.368	1.10916	0.0607756	2.84422e-75	2.579e-73
ENSMUSG00000066877.11	Nck2	non-catalytic region of tyrosine kinase adaptor protein 2	111.057	1.10663	0.18972	2.66686e-10	2.79356e-09
ENSMUSG00000029816.10	Gpnmb	glycoprotein (transmembrane) nmb	28193.8	1.09798	0.0149776	0	0
ENSMUSG00000026365.15	Cfh	complement component factor h	408.993	1.09016	0.0922425	2.94057e-33	9.82991e-32
ENSMUSG00000102496.1	NA	NA	12.1469	1.08773	0.811592	0.00127532	0.00495378
ENSMUSG00000029168.14	Dpysl5	dihydropyrimidinase-like 5	19.8752	1.08461	0.569135	0.000327763	0.00147356
ENSMUSG00000020340.16	Cyfip2	cytoplasmic FMR1 interacting protein 2	504.672	1.08461	0.0749744	1.95817e-48	1.011e-46
ENSMUSG00000024401.14	Tnf	tumor necrosis factor	2668.34	1.0831	0.0336059	8.07619e-229	2.85779e-226
ENSMUSG00000029561.17	Oasl2	2'-5' oligoadenylate synthetase-like 2	406.366	1.07993	0.0969539	6.65004e-30	2.01417e-28
ENSMUSG00000030760.14	Acer3	alkaline ceramidase 3	575.455	1.07785	0.0772723	2.90781e-45	1.36969e-43
ENSMUSG00000057948.12	Unc13d	unc-13 homolog D	141.133	1.07267	0.156439	3.46645e-13	4.64799e-12
ENSMUSG00000042272.17	Sestd1	SEC14 and spectrin domains 1	230.593	1.07166	0.11817	7.77578e-21	1.6162e-19
ENSMUSG00000032204.13	Aqp9	aquaporin 9	358.189	1.06927	0.102978	2.06695e-26	5.41288e-25
ENSMUSG00000024521.8	Pmaip1	phorbol-12-myristate-13-acetate-induced protein 1	763.473	1.06769	0.0676211	3.1659e-57	2.05968e-55
ENSMUSG00000024677.13	Ms4a6b	membrane-spanning 4-domains, subfamily A, member 6B	56.47	1.06451	0.312795	6.43945e-06	4.04256e-05
ENSMUSG00000026601.14	Axdnd1	axonemal dynein light chain domain containing 1	12.8274	1.06443	0.738769	0.00100966	0.004042
ENSMUSG00000056054.9	S100a8	S100 calcium binding protein A8 (calgranulin A)	998.342	1.06384	0.0712341	1.58892e-51	9.07559e-50
ENSMUSG00000024665.8	Fads2	fatty acid desaturase 2	144.351	1.06354	0.156751	5.25891e-13	6.96134e-12
ENSMUSG00000105677.1	NA	NA	59.0296	1.05904	0.252273	4.45856e-07	3.2835e-06
ENSMUSG00000043943.14	Naalad2	N-acetylated alpha-linked acidic dipeptidase 2	32.1992	1.05711	0.401544	5.25248e-05	0.000280467
ENSMUSG00000003746.16	Man1a	mannosidase 1, alpha	693.796	1.05371	0.0761955	1.19289e-44	5.51161e-43
ENSMUSG00000034855.13	Cxcl10	chemokine (C-X-C motif) ligand 10	67.336	1.05251	0.278107	1.86649e-06	1.27251e-05
ENSMUSG00000031748.16	Gnao1	guanine nucleotide binding protein, alpha O	37.5141	1.04765	0.365753	2.80944e-05	0.000157676
ENSMUSG00000042817.15	Flt3	FMS-like tyrosine kinase 3	243.473	1.04511	0.116853	1.87573e-20	3.81671e-19
ENSMUSG00000040511.14	Pvr	poliovirus receptor	234.171	1.04392	0.127736	1.39156e-17	2.48019e-16
ENSMUSG00000021265.3	Slc25a29	solute carrier family 25 (mitochondrial carrier, palmitoylcarnitine transporter), member 29	21.3714	1.04356	0.532939	0.000281419	0.00128755
ENSMUSG00000020814.13	Mxra7	matrix-remodelling associated 7	7.97173	1.0403	0.998476	0.00255688	0.00915704
ENSMUSG00000022265.7	Ank	progressive ankylosis	177.425	1.03462	0.147175	7.73282e-14	1.08604e-12
ENSMUSG00000022607.18	Ptk2	PTK2 protein tyrosine kinase 2	96.4766	1.03418	0.195537	3.12526e-09	2.94232e-08
ENSMUSG00000025790.14	Slco3a1	solute carrier organic anion transporter family, member 3a1	61.5095	1.03269	0.298459	4.91409e-06	3.14484e-05
ENSMUSG00000005397.8	Nid1	nidogen 1	52.5858	1.03232	0.300926	5.37411e-06	3.41963e-05
ENSMUSG00000033508.7	Asprv1	aspartic peptidase, retroviral-like 1	64.3126	1.02789	0.808114	0.00153471	0.00584244
ENSMUSG00000095419.1	NA	NA	265.092	1.02388	0.112756	4.45217e-21	9.34763e-20
ENSMUSG00000035000.8	Dpp4	dipeptidylpeptidase 4	99.5047	1.02003	0.195524	4.12615e-09	3.83486e-08
ENSMUSG00000089726.2	NA	NA	48.9801	1.01877	0.320744	1.10082e-05	6.64618e-05
ENSMUSG00000026628.13	Atf3	activating transcription factor 3	2536.97	1.01681	0.0369534	6.03337e-168	1.56307e-165
ENSMUSG00000031530.6	Dusp4	dual specificity phosphatase 4	14.1621	1.01218	0.715463	0.00108468	0.00429726
ENSMUSG00000036390.8	Gadd45a	growth arrest and DNA-damage-inducible 45 alpha	248.539	1.00931	0.124293	1.5652e-17	2.77603e-16
ENSMUSG00000090958.2	Lrrc32	leucine rich repeat containing 32	11.998	1.00845	0.753027	0.00131037	0.00507362
ENSMUSG00000003541.6	Ier3	immediate early response 3	867.513	1.00703	0.066908	1.44722e-52	8.39852e-51
ENSMUSG00000018909.15	Arrb1	arrestin, beta 1	2110.17	1.00568	0.0403998	4.05172e-138	8.51919e-136
ENSMUSG00000036086.16	Zranb3	zinc finger, RAN-binding domain containing 3	1060.49	1.00549	0.0605279	2.44143e-63	1.75348e-61
ENSMUSG00000002885.14	Adgre5	adhesion G protein-coupled receptor E5	1518.6	1.00438	0.0465171	9.53686e-105	1.25783e-102
ENSMUSG00000021125.6	Arg2	arginase type II	64.1366	1.00431	0.343486	2.17584e-05	0.000124969
ENSMUSG00000048621.3	Gm6377	predicted gene 6377	598.701	1.0042	0.0786444	9.59298e-39	3.88757e-37
ENSMUSG00000028717.12	Tal1	T cell acute lymphocytic leukemia 1	6.36721	1.00072	1.43722	0.00393048	0.0133388

## Sheet: Table S1B
Table S1. Differential expression of RNAs in flow cytometry-sorted CD11c+CD11b+ mAMs versus resident AMs from old mice (CD11c+).
(B) Downregulated genes with false discovery rate (FDR) adjusted p-value <0.05 and log2 fold change < -1.
baseMean: log2 RPMs in control cells at each time point; log2FoldChange: ratios of normalized counts in CD11c+CD11b+ mAMs / resident AMs from old mice (CD11c+).
lfcSE: log fold-change standard error. pvalue: unadjusted p values. padj: FDR-adjusted p value.
ENSEMBL	SYMBOL	GENENAME	baseMean	log2FoldChange	lfcSE	pvalue	padj
ENSMUSG00000052305.6	Hbb-b1	hemoglobin, beta adult major chain	213.315	-1.7101	0.12565	1.38405e-42	6.12189e-41
ENSMUSG00000069919.7	Hba-a1	hemoglobin alpha, adult chain 1	59.9923	-1.54001	0.225231	2.71787e-12	3.38463e-11
ENSMUSG00000097971.3	NA	NA	2197.06	-1.49835	0.306207	1.37982e-07	1.08266e-06
ENSMUSG00000048191.15	Muc6	mucin 6, gastric	9.42319	-1.28688	0.814847	0.000706008	0.0029391
ENSMUSG00000037033.9	Clca3b	chloride channel accessory 3B	10.2026	-1.27696	1.55256	0.00231061	0.00839949
ENSMUSG00000084061.1	NA	NA	75.0071	-1.15644	0.206446	1.30264e-09	1.27093e-08
ENSMUSG00000086324.8	NA	NA	1660.99	-1.12689	0.411588	4.51923e-05	0.000244554
ENSMUSG00000030170.14	Wnt5b	wingless-type MMTV integration site family, member 5B	27.6536	-1.07594	0.535032	0.00025249	0.00116678
ENSMUSG00000067149.6	Jchain	immunoglobulin joining chain	14.1281	-1.05234	0.635476	0.000596274	0.0025302
ENSMUSG00000036585.16	Fgf1	fibroblast growth factor 1	358.8	-1.02857	0.0963105	5.98463e-28	1.66651e-26
