# Supplementary material for: Lung environment in healthy old age shapes the phenotype and CCR2-mediated recruitment of a subset of apoptotic, high-turnover alveolar macrophages
Source: Research Square preprint supplement (doi:10.21203/rs.3.rs-7123735/v1), 2025-07-25
Supplement: Supplementary file 2 [file 4e0130d6baf46d6953837c36.xlsx]

## Sheet: Table S2A
Table S2. Differential expression of RNAs in TRAMS in old mice versus young mice
(A) Upregulated genes with false discovery rate (FDR) adjusted p-value <0.05 and log2 fold change >1.
baseMean: log2 RPMs in control cells at each time point; log2FoldChange: ratios of normalized counts in TRAMs in old mice / young mice.
lfcSE: log fold-change standard error. pvalue: unadjusted p values. padj: FDR-adjusted p value.
ENSEMBL	SYMBOL	GENENAME	baseMean	log2FoldChange	lfcSE	pvalue	padj
ENSMUSG00000031502.11	Col4a1	collagen, type IV, alpha 1	1519.89	8.00401	0.29535	2.33298e-163	8.90708e-161
ENSMUSG00000041202.12	Pla2g2d	phospholipase A2, group IID	2044.02	7.45391	0.264706	7.2693e-176	2.92953e-173
ENSMUSG00000028197.4	Col24a1	collagen, type XXIV, alpha 1	57.9285	7.22103	1.10722	1.83286e-12	2.7245e-11
ENSMUSG00000031503.13	Col4a2	collagen, type IV, alpha 2	1717.78	6.49109	0.158347	0	0
ENSMUSG00000035413.8	Tmem98	transmembrane protein 98	18.8373	6.35573	1.14117	9.9788e-10	1.13192e-08
ENSMUSG00000095351.2	NA	NA	14.919	6.2658	1.14906	1.89179e-09	2.0714e-08
ENSMUSG00000033377.14	Palmd	palmdelphin	137.27	6.19578	0.589425	7.30007e-27	2.52165e-25
ENSMUSG00000076609.2	NA	NA	251.822	5.87373	0.323863	2.14989e-74	2.73601e-72
ENSMUSG00000043003.14	Rasef	RAS and EF hand domain containing	220.173	5.31921	0.281621	2.57404e-80	3.6612e-78
ENSMUSG00000001504.10	Irx2	Iroquois homeobox 2	40.8635	5.29547	1.23194	2.09539e-07	1.81149e-06
ENSMUSG00000056073.16	Grik2	glutamate receptor, ionotropic, kainate 2 (beta 2)	7.62363	5.20783	1.33335	5.73851e-07	4.73305e-06
ENSMUSG00000076617.9	NA	NA	551.519	5.05161	0.172389	1.89172e-189	8.57659e-187
ENSMUSG00000044646.15	Zbtb7c	zinc finger and BTB domain containing 7C	68.0455	4.92877	0.503687	1.87169e-23	5.51919e-22
ENSMUSG00000025808.17	Ccdc7a	coiled-coil domain containing 7A	36.0609	4.78973	0.624812	1.6265e-15	3.06061e-14
ENSMUSG00000038721.8	Hoxb7	homeobox B7	19.1241	4.78662	1.37873	1.56942e-06	1.20408e-05
ENSMUSG00000063060.6	Sox7	SRY (sex determining region Y)-box 7	180.452	4.71306	0.740694	1.06212e-11	1.46336e-10
ENSMUSG00000067149.6	Jchain	immunoglobulin joining chain	14.1281	4.6502	1.16282	4.62964e-07	3.85801e-06
ENSMUSG00000029321.1	Slc10a6	solute carrier family 10 (sodium/bile acid cotransporter family), member 6	48.4976	4.5795	1.41415	2.5626e-06	1.9017e-05
ENSMUSG00000020121.15	Srgap1	SLIT-ROBO Rho GTPase activating protein 1	61.8759	4.40055	0.410086	6.88127e-28	2.50209e-26
ENSMUSG00000000266.11	Mid2	midline 2	22.4555	4.22477	0.820308	3.9928e-09	4.22521e-08
ENSMUSG00000027962.14	Vcam1	vascular cell adhesion molecule 1	339.103	4.17289	0.20594	2.52327e-92	4.2567e-90
ENSMUSG00000048826.7	Dact2	dishevelled-binding antagonist of beta-catenin 2	75.3517	4.09358	0.552151	3.18198e-15	5.85839e-14
ENSMUSG00000090015.8	Gm15446	predicted gene 15446	32.6891	4.0359	0.582239	8.26795e-14	1.37087e-12
ENSMUSG00000026077.15	Npas2	neuronal PAS domain protein 2	21.197	3.9869	1.01345	4.31781e-07	3.6147e-06
ENSMUSG00000041548.4	Hspb8	heat shock protein 8	85.8468	3.92467	0.714687	4.26502e-10	5.05531e-09
ENSMUSG00000104213.5	NA	NA	12.6488	3.82496	1.74829	1.86357e-05	0.00011979
ENSMUSG00000035441.14	Myo1d	myosin ID	298.456	3.81295	0.1773	3.82186e-104	7.92107e-102
ENSMUSG00000015709.9	Arnt2	aryl hydrocarbon receptor nuclear translocator 2	426.642	3.80722	0.296635	2.176e-39	1.22362e-37
ENSMUSG00000036136.9	Fam110c	family with sequence similarity 110, member C	33.0578	3.79079	0.650968	5.11799e-11	6.62371e-10
ENSMUSG00000054863.9	Tafa5	TAFA chemokine like family member 5	133.985	3.7021	0.258635	2.58288e-48	1.7844e-46
ENSMUSG00000040592.11	Cd79b	CD79B antigen	12.7482	3.70194	1.80392	2.40833e-05	0.000151847
ENSMUSG00000019768.16	Esr1	estrogen receptor 1 (alpha)	29.4384	3.66774	0.782881	1.6896e-08	1.66527e-07
ENSMUSG00000051257.3	Trap1a	tumor rejection antigen P1A	207.434	3.58563	0.194582	7.49646e-78	1.01644e-75
ENSMUSG00000037736.20	Limch1	LIM and calponin homology domains 1	10.858	3.54643	1.15148	3.85088e-06	2.7644e-05
ENSMUSG00000026986.14	Hnmt	histamine N-methyltransferase	142.654	3.52438	0.233278	9.74861e-54	7.90127e-52
ENSMUSG00000020620.14	Abca8b	ATP-binding cassette, sub-family A (ABC1), member 8b	19.3316	3.50444	1.10309	3.07624e-06	2.24611e-05
ENSMUSG00000072941.5	Sod3	superoxide dismutase 3, extracellular	35.3954	3.47849	0.42007	6.05194e-19	1.40934e-17
ENSMUSG00000022246.14	Rai14	retinoic acid induced 14	256.691	3.45506	0.461028	3.08012e-16	6.04688e-15
ENSMUSG00000022656.15	Nectin3	nectin cell adhesion molecule 3	41.046	3.41404	0.411528	4.47994e-19	1.04662e-17
ENSMUSG00000036800.8	Fam135b	family with sequence similarity 135, member B	13.6669	3.39623	0.870688	3.60078e-07	3.03017e-06
ENSMUSG00000026610.13	Esrrg	estrogen-related receptor gamma	247.386	3.37599	0.167075	3.2291e-93	5.5115e-91
ENSMUSG00000035934.16	Pknox2	Pbx/knotted 1 homeobox 2	14.6761	3.30214	0.777762	9.01147e-08	8.16095e-07
ENSMUSG00000058317.12	Ube2e2	ubiquitin-conjugating enzyme E2E 2	23.4088	3.22832	0.686248	1.05442e-08	1.06529e-07
ENSMUSG00000102697.1	Pcdhac2	protocadherin alpha subfamily C, 2	7.56746	3.15494	2.00104	6.27716e-05	0.000365242
ENSMUSG00000019966.18	Kitl	kit ligand	88.4152	3.08824	0.532109	2.20818e-11	2.95265e-10
ENSMUSG00000029207.16	Apbb2	amyloid beta (A4) precursor protein-binding, family B, member 2	183.553	3.07284	0.230231	2.27711e-43	1.38227e-41
ENSMUSG00000049580.12	Tsku	tsukushi, small leucine rich proteoglycan	184.42	3.04497	0.280266	3.40982e-30	1.35533e-28
ENSMUSG00000030724.7	Cd19	CD19 antigen	13.7995	3.00496	1.24007	1.70095e-05	0.000109922
ENSMUSG00000040536.15	Necab1	N-terminal EF-hand calcium binding protein 1	85.7504	3.00057	1.85244	6.55496e-05	0.000379942
ENSMUSG00000003665.7	Has1	hyaluronan synthase 1	46.6066	2.96567	0.371131	3.41586e-18	7.57758e-17
ENSMUSG00000052485.7	Tmem171	transmembrane protein 171	41.2108	2.92083	1.57884	4.83129e-05	0.000288209
ENSMUSG00000021779.17	Thrb	thyroid hormone receptor beta	100.501	2.91834	0.283488	1.62583e-27	5.80973e-26
ENSMUSG00000052477.15	C130026I21Rik	RIKEN cDNA C130026I21 gene	93.9302	2.88528	0.399739	1.59601e-15	3.01104e-14
ENSMUSG00000063458.13	Lrmda	leucine rich melanocyte differentiation associated	211.625	2.74018	0.154787	1.01039e-72	1.23183e-70
ENSMUSG00000028517.8	Plpp3	phospholipid phosphatase 3	818.319	2.71169	0.112789	2.68482e-130	6.83358e-128
ENSMUSG00000026246.12	Alppl2	alkaline phosphatase, placental-like 2	126.766	2.70894	0.198496	6.32957e-45	4.04535e-43
ENSMUSG00000004612.9	Nkg7	natural killer cell group 7 sequence	12.6069	2.70824	1.08678	1.73027e-05	0.000111766
ENSMUSG00000037492.16	Zmat4	zinc finger, matrin type 4	115.264	2.70085	0.22963	2.01279e-34	9.41986e-33
ENSMUSG00000052387.16	Trpm3	transient receptor potential cation channel, subfamily M, member 3	15.6106	2.60587	0.754444	2.05262e-06	1.54138e-05
ENSMUSG00000039741.15	Bahcc1	BAH domain and coiled-coil containing 1	20.5826	2.60294	0.675466	5.9413e-07	4.87536e-06
ENSMUSG00000061601.15	Pclo	piccolo (presynaptic cytomatrix protein)	34.0199	2.53631	0.405908	3.18363e-12	4.65605e-11
ENSMUSG00000061132.13	Blnk	B cell linker	200.733	2.49885	0.308627	4.51761e-18	9.97588e-17
ENSMUSG00000031740.8	Mmp2	matrix metallopeptidase 2	347.911	2.49596	0.266029	5.01978e-23	1.45074e-21
ENSMUSG00000047867.11	Gimap6	GTPase, IMAP family member 6	28.9084	2.47956	0.55702	7.1451e-08	6.55668e-07
ENSMUSG00000049598.9	Vsig8	V-set and immunoglobulin domain containing 8	27.0304	2.46327	0.562376	1.00309e-07	9.026e-07
ENSMUSG00000074934.3	Grem1	gremlin 1, DAN family BMP antagonist	18.9315	2.44433	1.95127	0.000156186	0.000833989
ENSMUSG00000023960.13	Enpp5	ectonucleotide pyrophosphatase/phosphodiesterase 5	817.958	2.43798	0.0886923	2.25807e-168	8.85406e-166
ENSMUSG00000023830.14	Igf2r	insulin-like growth factor 2 receptor	592.706	2.43215	0.125339	6.79383e-86	1.05984e-83
ENSMUSG00000019558.14	Slc6a8	solute carrier family 6 (neurotransmitter transporter, creatine), member 8	633.026	2.41859	0.136524	3.28645e-72	3.97332e-70
ENSMUSG00000078597.2	Cyp4a12b	cytochrome P450, family 4, subfamily a, polypeptide 12B	14.8126	2.41359	0.76809	5.59693e-06	3.92461e-05
ENSMUSG00000052889.11	Prkcb	protein kinase C, beta	264.521	2.38005	0.183852	3.14777e-40	1.81222e-38
ENSMUSG00000029762.6	Akr1b8	aldo-keto reductase family 1, member B8	458.75	2.37905	0.126135	2.99004e-81	4.38177e-79
ENSMUSG00000016283.13	H2-M2	histocompatibility 2, M region locus 2	676.541	2.36099	0.14792	3.27469e-59	3.08502e-57
ENSMUSG00000048126.16	Col6a3	collagen, type VI, alpha 3	89.1349	2.34239	0.290863	1.23266e-17	2.64547e-16
ENSMUSG00000038692.8	Hoxb4	homeobox B4	23.6451	2.33517	0.818223	1.14275e-05	7.61555e-05
ENSMUSG00000035547.14	Capn5	calpain 5	35.8679	2.33076	0.434357	1.20339e-09	1.35444e-08
ENSMUSG00000044303.6	Cdkn2a	cyclin dependent kinase inhibitor 2A	135.427	2.29437	0.188521	8.46739e-36	4.20702e-34
ENSMUSG00000032035.16	Ets1	E26 avian leukemia oncogene 1, 5' domain	90.3673	2.28249	0.26238	6.62004e-20	1.64177e-18
ENSMUSG00000025372.16	Baiap2	brain-specific angiogenesis inhibitor 1-associated protein 2	321.097	2.27414	0.143072	1.43418e-58	1.29236e-56
ENSMUSG00000003379.7	Cd79a	CD79A antigen (immunoglobulin-associated alpha)	13.2083	2.27387	1.41376	0.000107964	0.000597157
ENSMUSG00000021904.6	Sema3g	sema domain, immunoglobulin domain (Ig), short basic domain, secreted, (semaphorin) 3G	17.3276	2.24895	0.565568	7.0183e-07	5.71068e-06
ENSMUSG00000042474.6	Fcmr	Fc fragment of IgM receptor	7.4913	2.22439	1.95712	0.000213976	0.00110989
ENSMUSG00000026303.6	Mlph	melanophilin	1511.2	2.20358	0.0581489	0	0
ENSMUSG00000015665.8	Awat1	acyl-CoA wax alcohol acyltransferase 1	566.839	2.17269	0.142387	4.75788e-54	3.96709e-52
ENSMUSG00000024770.14	Lipn	lipase, family member N	51.8818	2.15471	0.279933	4.58997e-16	8.92644e-15
ENSMUSG00000008193.13	Spib	Spi-B transcription factor (Spi-1/PU.1 related)	30.2107	2.14278	0.482705	1.62635e-07	1.41968e-06
ENSMUSG00000030605.15	Mfge8	milk fat globule-EGF factor 8 protein	6818.58	2.13449	0.0466599	0	0
ENSMUSG00000023274.14	Cd4	CD4 antigen	207.693	2.12546	0.25019	7.49429e-19	1.73686e-17
ENSMUSG00000010122.14	Slc47a1	solute carrier family 47, member 1	8.79169	2.10174	1.02312	6.18243e-05	0.000360654
ENSMUSG00000017491.9	Rarb	retinoic acid receptor, beta	21.7359	2.09855	0.577723	2.51677e-06	1.86864e-05
ENSMUSG00000018217.12	Pmp22	peripheral myelin protein 22	284.527	2.09566	0.267975	2.19096e-16	4.33059e-15
ENSMUSG00000044206.3	Vsig4	V-set and immunoglobulin domain containing 4	22.353	2.06839	0.459903	1.5138e-07	1.32622e-06
ENSMUSG00000032766.9	Gng11	guanine nucleotide binding protein (G protein), gamma 11	15.2768	2.05989	1.04997	7.49379e-05	0.000429433
ENSMUSG00000041481.17	Serpina3g	serine (or cysteine) peptidase inhibitor, clade A, member 3G	37.3627	2.04239	0.410526	2.01575e-08	1.97198e-07
ENSMUSG00000032418.15	Me1	malic enzyme 1, NADP(+)-dependent, cytosolic	72.5414	2.03613	0.288517	8.31521e-14	1.37714e-12
ENSMUSG00000013483.14	Card14	caspase recruitment domain family, member 14	24.1369	2.02571	1.14451	0.000104984	0.000582226
ENSMUSG00000054435.16	Gimap4	GTPase, IMAP family member 4	33.4674	2.02032	0.423162	5.26475e-08	4.91829e-07
ENSMUSG00000034612.7	Chst11	carbohydrate sulfotransferase 11	203.751	2.0176	0.253909	1.0641e-16	2.15013e-15
ENSMUSG00000022415.12	Syngr1	synaptogyrin 1	394.087	2.01655	0.206036	7.55399e-24	2.26901e-22
ENSMUSG00000042485.7	Mustn1	musculoskeletal, embryonic nuclear protein 1	129.303	2.01106	0.174861	8.11315e-32	3.44168e-30
ENSMUSG00000029608.10	Rph3a	rabphilin 3A	61.1162	2.009	0.390626	9.74275e-09	9.87066e-08
ENSMUSG00000025586.17	Cpeb1	cytoplasmic polyadenylation element binding protein 1	360.676	1.98149	0.112052	4.0269e-71	4.63669e-69
ENSMUSG00000037762.6	Slc16a9	solute carrier family 16 (monocarboxylic acid transporters), member 9	20.055	1.97917	1.8754	0.000294209	0.00148208
ENSMUSG00000073555.1	Gm4951	predicted gene 4951	87.7575	1.97388	0.221285	3.11369e-20	7.8426e-19
ENSMUSG00000028970.9	Abcb1b	ATP-binding cassette, sub-family B (MDR/TAP), member 1B	77.4983	1.96784	0.35627	1.51798e-09	1.67857e-08
ENSMUSG00000071723.7	Gspt2	G1 to S phase transition 2	16.4077	1.96704	0.738744	2.51663e-05	0.000158126
ENSMUSG00000050097.6	Ces2b	carboxyesterase 2B	20.5748	1.95455	0.459006	4.54822e-07	3.80102e-06
ENSMUSG00000025854.15	Fam20c	family with sequence similarity 20, member C	913.259	1.92453	0.0812347	3.94941e-125	9.71153e-123
ENSMUSG00000058435.6	Btnl4	butyrophilin-like 4	133.555	1.92058	0.269028	6.57106e-14	1.09831e-12
ENSMUSG00000036905.8	C1qb	complement component 1, q subcomponent, beta polypeptide	1294.08	1.91427	0.30126	1.33055e-11	1.81938e-10
ENSMUSG00000005397.8	Nid1	nidogen 1	52.5858	1.91308	0.360897	5.45103e-09	5.6514e-08
ENSMUSG00000035385.5	Ccl2	chemokine (C-C motif) ligand 2	277.726	1.90876	0.180887	4.26262e-27	1.49377e-25
ENSMUSG00000052305.6	Hbb-b1	hemoglobin, beta adult major chain	213.315	1.90774	0.1288	1.11789e-50	8.27467e-49
ENSMUSG00000087659.7	NA	NA	10.3062	1.86493	1.67665	0.00031274	0.00156889
ENSMUSG00000046727.13	Cystm1	cysteine-rich transmembrane module containing 1	130.368	1.86474	0.187799	2.96923e-24	9.08811e-23
ENSMUSG00000028108.15	Ecm1	extracellular matrix protein 1	2174.77	1.86117	0.0496694	0	0
ENSMUSG00000066842.18	Hmcn1	hemicentin 1	187.474	1.85744	0.14373	3.45421e-39	1.93489e-37
ENSMUSG00000037032.16	Apbb1	amyloid beta (A4) precursor protein-binding, family B, member 1	45.8163	1.84866	0.335084	1.99001e-09	2.17076e-08
ENSMUSG00000065987.12	Cd209b	CD209b antigen	289.653	1.84852	0.106247	9.29935e-69	1.0144e-66
ENSMUSG00000041957.15	Pkp2	plakophilin 2	102.849	1.84495	0.334111	1.94943e-09	2.12809e-08
ENSMUSG00000055675.6	Kbtbd11	kelch repeat and BTB (POZ) domain containing 11	68.3545	1.84319	0.271657	9.28172e-13	1.41449e-11
ENSMUSG00000086712.2	AI427809	expressed sequence AI427809	60.0864	1.83496	0.340952	4.11027e-09	4.34634e-08
ENSMUSG00000097184.2	4632428C04Rik	RIKEN cDNA 4632428C04 gene	15.3688	1.83334	1.04193	0.000131755	0.000714313
ENSMUSG00000076612.8	NA	NA	19.0634	1.83066	0.492543	2.81936e-06	2.07526e-05
ENSMUSG00000040276.15	Pacsin1	protein kinase C and casein kinase substrate in neurons 1	98.777	1.82225	0.190938	1.44949e-22	4.07542e-21
ENSMUSG00000023913.17	Pla2g7	phospholipase A2, group VII (platelet-activating factor acetylhydrolase, plasma)	702.396	1.82158	0.124924	4.26941e-49	3.00683e-47
ENSMUSG00000029851.5	Tcaf2	TRPM8 channel-associated factor 2	43.509	1.81914	0.327989	1.77742e-09	1.95207e-08
ENSMUSG00000033192.5	Lpcat2	lysophosphatidylcholine acyltransferase 2	819.066	1.8001	0.0854988	2.65252e-99	5.27161e-97
ENSMUSG00000055976.6	Cldn23	claudin 23	48.2015	1.79917	0.337897	5.75024e-09	5.94192e-08
ENSMUSG00000034634.7	Ly6d	lymphocyte antigen 6 complex, locus D	8.85722	1.79183	1.82814	0.00038479	0.00189624
ENSMUSG00000024501.20	Dpysl3	dihydropyrimidinase-like 3	126.512	1.78801	0.193282	2.49274e-21	6.63571e-20
ENSMUSG00000044103.4	Il1f9	interleukin 1 family, member 9	183.778	1.78602	0.699546	3.77929e-05	0.000230088
ENSMUSG00000033565.18	Rbfox2	RNA binding protein, fox-1 homolog (C. elegans) 2	127.556	1.76826	0.171218	6.43516e-26	2.11704e-24
ENSMUSG00000056656.6	Apol8	apolipoprotein L 8	29.2881	1.7657	0.524969	7.29525e-06	5.00186e-05
ENSMUSG00000020865.16	Abcc3	ATP-binding cassette, sub-family C (CFTR/MRP), member 3	176.51	1.76121	0.231136	2.6284e-15	4.87009e-14
ENSMUSG00000074345.4	Tnfaip8l3	tumor necrosis factor, alpha-induced protein 8-like 3	38.0296	1.75574	0.345095	1.8933e-08	1.85595e-07
ENSMUSG00000067341.6	H2-Eb2	histocompatibility 2, class II antigen E beta2	102.406	1.74628	0.27203	1.18188e-11	1.62528e-10
ENSMUSG00000034751.17	Mast4	microtubule associated serine/threonine kinase family member 4	117.215	1.74622	0.228163	2.07706e-15	3.87326e-14
ENSMUSG00000069917.7	Hba-a2	hemoglobin alpha, adult chain 2	28.3932	1.74215	0.36518	7.86998e-08	7.1855e-07
ENSMUSG00000043822.18	Adamtsl5	ADAMTS-like 5	248.412	1.73734	0.15193	3.72017e-31	1.52464e-29
ENSMUSG00000002885.14	Adgre5	adhesion G protein-coupled receptor E5	1518.6	1.73663	0.0641608	3.58793e-162	1.33471e-159
ENSMUSG00000019852.7	Arfgef3	ARFGEF family member 3	28.4917	1.73551	0.524305	8.46173e-06	5.75811e-05
ENSMUSG00000036402.13	Gng12	guanine nucleotide binding protein (G protein), gamma 12	1242.21	1.72654	0.0611793	4.89312e-176	2.02827e-173
ENSMUSG00000069919.7	Hba-a1	hemoglobin alpha, adult chain 1	59.9923	1.725	0.230959	8.61423e-15	1.541e-13
ENSMUSG00000028278.14	Rragd	Ras-related GTP binding D	173.709	1.72021	0.224459	1.98109e-15	3.70383e-14
ENSMUSG00000091017.1	Fam71a	family with sequence similarity 71, member A	49.5829	1.70801	0.295101	5.27062e-10	6.17659e-09
ENSMUSG00000025268.15	Maged2	melanoma antigen, family D, 2	17.115	1.69236	1.7686	0.000441034	0.00214572
ENSMUSG00000039062.15	Anpep	alanyl (membrane) aminopeptidase	2155.36	1.68033	0.0577107	3.66337e-187	1.61055e-184
ENSMUSG00000023092.16	Fhl1	four and a half LIM domains 1	67.3072	1.67881	0.229371	2.70568e-14	4.65647e-13
ENSMUSG00000040828.10	Catsperd	cation channel sperm associated auxiliary subunit delta	127.235	1.67156	0.180787	3.09772e-21	8.21604e-20
ENSMUSG00000020334.6	Slc22a4	solute carrier family 22 (organic cation transporter), member 4	76.6711	1.66856	0.311558	5.29632e-09	5.51213e-08
ENSMUSG00000076441.9	Ass1	argininosuccinate synthetase 1	264.279	1.65883	0.140024	3.37326e-33	1.51515e-31
ENSMUSG00000029417.9	Cxcl9	chemokine (C-X-C motif) ligand 9	222.674	1.6451	0.130106	1.87569e-37	9.78865e-36
ENSMUSG00000050957.4	Insl6	insulin-like 6	84.5632	1.64168	0.231254	1.32975e-13	2.16764e-12
ENSMUSG00000039607.16	Rbms3	RNA binding motif, single stranded interacting protein	163.79	1.64003	0.162404	8.0369e-25	2.49677e-23
ENSMUSG00000035914.11	Cd276	CD276 antigen	185.657	1.6372	0.14457	1.49891e-30	6.00724e-29
ENSMUSG00000058427.10	Cxcl2	chemokine (C-X-C motif) ligand 2	7064.96	1.63123	0.0298456	0	0
ENSMUSG00000003354.6	Ccdc65	coiled-coil domain containing 65	29.6063	1.6227	0.534747	1.68936e-05	0.000109367
ENSMUSG00000075307.3	Klhl41	kelch-like 41	80.2205	1.62253	0.210828	1.63942e-15	3.08092e-14
ENSMUSG00000026177.11	Slc11a1	solute carrier family 11 (proton-coupled divalent metal ion transporters), member 1	1215.13	1.61568	0.0920743	1.06392e-69	1.17827e-67
ENSMUSG00000030523.18	Trpm1	transient receptor potential cation channel, subfamily M, member 1	84.0462	1.60885	0.194854	1.8771e-17	3.97561e-16
ENSMUSG00000060586.11	H2-Eb1	histocompatibility 2, class II antigen E beta	13686.9	1.60745	0.0185368	0	0
ENSMUSG00000032094.8	Cd3d	CD3 antigen, delta polypeptide	10.8745	1.60386	0.89482	0.000167074	0.00088543
ENSMUSG00000052062.14	Pard3b	par-3 family cell polarity regulator beta	41.8248	1.60146	0.308454	1.16045e-08	1.16673e-07
ENSMUSG00000036887.5	C1qa	complement component 1, q subcomponent, alpha polypeptide	1566.93	1.59399	0.328398	5.4572e-08	5.08497e-07
ENSMUSG00000055555.1	4930502E18Rik	RIKEN cDNA 4930502E18 gene	194.498	1.59315	0.129954	2.38367e-35	1.16048e-33
ENSMUSG00000032322.14	Pstpip1	proline-serine-threonine phosphatase-interacting protein 1	181.817	1.59044	0.21428	1.28003e-14	2.25372e-13
ENSMUSG00000013584.5	Aldh1a2	aldehyde dehydrogenase family 1, subfamily A2	770.601	1.59041	0.0900046	1.23903e-70	1.40436e-68
ENSMUSG00000071042.12	Rasgrp3	RAS, guanyl releasing protein 3	51.414	1.58626	0.504519	1.34799e-05	8.89344e-05
ENSMUSG00000055737.12	Ghr	growth hormone receptor	11.1438	1.58224	0.919182	0.000191462	0.0010046
ENSMUSG00000039264.9	Gimap3	GTPase, IMAP family member 3	38.6223	1.56833	0.350644	2.55758e-07	2.1904e-06
ENSMUSG00000020010.7	Vnn3	vanin 3	55.6392	1.56578	0.636544	5.59318e-05	0.000328925
ENSMUSG00000073418.4	C4b	complement component 4B (Chido blood group)	331.317	1.56415	0.107064	4.12914e-49	2.92222e-47
ENSMUSG00000015222.18	Map2	microtubule-associated protein 2	10.2597	1.56348	0.830748	0.000152946	0.000817889
ENSMUSG00000039716.12	Dock3	dedicator of cyto-kinesis 3	62.6392	1.56237	0.380495	9.47348e-07	7.51867e-06
ENSMUSG00000030329.11	Pianp	PILR alpha associated neural protein	177.531	1.55916	0.230278	1.22298e-12	1.84823e-11
ENSMUSG00000025006.18	Sorbs1	sorbin and SH3 domain containing 1	120.679	1.55438	0.17841	3.83779e-19	9.05343e-18
ENSMUSG00000034275.18	Igsf9b	immunoglobulin superfamily, member 9B	21.8063	1.55246	0.451613	6.68284e-06	4.61909e-05
ENSMUSG00000046687.6	Gm5424	argininosuccinate synthase pseudogene	93.011	1.54911	0.233675	3.07761e-12	4.5101e-11
ENSMUSG00000025085.16	Ablim1	actin-binding LIM protein 1	52.0391	1.53848	0.32735	1.00351e-07	9.026e-07
ENSMUSG00000033082.10	Clec1a	C-type lectin domain family 1, member a	295.541	1.51482	0.104708	3.22608e-48	2.2182e-46
ENSMUSG00000045441.5	Gprin3	GPRIN family member 3	11.6147	1.50265	0.768865	0.000146439	0.000785991
ENSMUSG00000029377.5	Ereg	epiregulin	146.441	1.50231	0.167778	4.28047e-20	1.07256e-18
ENSMUSG00000023868.17	Pde10a	phosphodiesterase 10A	93.344	1.48915	0.180084	1.52535e-17	3.24482e-16
ENSMUSG00000114608.1	NA	NA	87.368	1.48425	0.188454	3.58612e-16	7.01178e-15
ENSMUSG00000005360.14	Slc1a3	solute carrier family 1 (glial high affinity glutamate transporter), member 3	535.698	1.47925	0.082228	3.94808e-73	4.89561e-71
ENSMUSG00000045092.8	S1pr1	sphingosine-1-phosphate receptor 1	56.0143	1.47868	0.629345	7.41127e-05	0.000425536
ENSMUSG00000033213.16	AA467197	expressed sequence AA467197	329.119	1.47048	0.123196	1.10988e-33	5.09563e-32
ENSMUSG00000030745.9	Il21r	interleukin 21 receptor	141.375	1.46541	0.302966	5.0414e-08	4.7218e-07
ENSMUSG00000041538.16	H2-Ob	histocompatibility 2, O region beta locus	123.91	1.45142	0.192893	4.93299e-15	8.97965e-14
ENSMUSG00000036086.16	Zranb3	zinc finger, RAN-binding domain containing 3	1060.49	1.448	0.0737408	1.22781e-86	1.97923e-84
ENSMUSG00000033768.17	Nrxn2	neurexin II	22.616	1.43425	1.69661	0.000666358	0.00309559
ENSMUSG00000015305.6	Sash1	SAM and SH3 domain containing 1	297.153	1.42963	0.156647	7.75353e-21	2.01592e-19
ENSMUSG00000031410.14	Nxf7	nuclear RNA export factor 7	124.998	1.42478	0.155078	4.37166e-21	1.15107e-19
ENSMUSG00000058046.1	4933430I17Rik	RIKEN cDNA 4933430I17 gene	46.672	1.42113	0.628163	9.1643e-05	0.000516533
ENSMUSG00000068227.9	Il2rb	interleukin 2 receptor, beta chain	27.1209	1.41249	0.457319	1.57085e-05	0.000102289
ENSMUSG00000029380.11	Cxcl1	chemokine (C-X-C motif) ligand 1	768.871	1.40561	0.0913224	2.57045e-54	2.16815e-52
ENSMUSG00000116820.1	NA	NA	43.7559	1.40208	0.422964	8.88165e-06	6.01283e-05
ENSMUSG00000098489.1	Mir7678	microRNA 7678	21.5523	1.40086	0.48932	2.65977e-05	0.000166471
ENSMUSG00000033066.15	Gas7	growth arrest specific 7	399.645	1.39956	0.136572	1.33784e-25	4.32282e-24
ENSMUSG00000003355.7	Fkbp11	FK506 binding protein 11	142.924	1.38454	0.213952	5.93901e-12	8.38979e-11
ENSMUSG00000022235.15	Cmbl	carboxymethylenebutenolidase-like (Pseudomonas)	938.724	1.37846	0.060202	6.88741e-117	1.56129e-114
ENSMUSG00000030259.12	Rassf8	Ras association (RalGDS/AF-6) domain family (N-terminal) member 8	186.659	1.37469	0.173108	1.58905e-16	3.17111e-15
ENSMUSG00000027611.12	Procr	protein C receptor, endothelial	421.739	1.37217	0.108223	8.83828e-38	4.69691e-36
ENSMUSG00000030144.4	Clec4d	C-type lectin domain family 4, member d	1972.91	1.35827	0.0503587	4.1759e-161	1.37691e-158
ENSMUSG00000053219.15	Raet1e	retinoic acid early transcript 1E	86.1703	1.35467	0.195611	2.67065e-13	4.22067e-12
ENSMUSG00000035863.14	Palm	paralemmin	147.887	1.35015	0.161868	5.63457e-18	1.24046e-16
ENSMUSG00000020279.10	Il9r	interleukin 9 receptor	9.89031	1.34512	1.08308	0.000522961	0.00249291
ENSMUSG00000049804.9	Armcx4	armadillo repeat containing, X-linked 4	114.235	1.33956	0.189224	8.67074e-14	1.43112e-12
ENSMUSG00000109893.1	NA	NA	16.3506	1.32954	0.602755	0.000109611	0.000605346
ENSMUSG00000022504.10	Ciita	class II transactivator	955.264	1.3062	0.0594986	8.15824e-108	1.71536e-105
ENSMUSG00000033436.13	Armcx2	armadillo repeat containing, X-linked 2	25.7407	1.30241	0.576071	9.9876e-05	0.000557507
ENSMUSG00000024610.15	Cd74	CD74 antigen (invariant polypeptide of major histocompatibility complex, class II antigen-associated)	68618	1.3016	0.0115794	0	0
ENSMUSG00000024899.7	Papss2	3'-phosphoadenosine 5'-phosphosulfate synthase 2	84.794	1.294	0.43901	2.15795e-05	0.000137207
ENSMUSG00000032285.15	Dnaja4	DnaJ heat shock protein family (Hsp40) member A4	107.468	1.29336	0.18209	6.04227e-14	1.0146e-12
ENSMUSG00000062372.13	Otof	otoferlin	112.399	1.29217	0.172808	3.97187e-15	7.27575e-14
ENSMUSG00000036594.15	H2-Aa	histocompatibility 2, class II antigen A, alpha	24324.2	1.29125	0.015163	0	0
ENSMUSG00000048078.16	Tenm4	teneurin transmembrane protein 4	26.4221	1.28537	1.24496	0.000722455	0.00332434
ENSMUSG00000044770.14	Scml4	Scm polycomb group protein like 4	281.465	1.27523	0.108812	7.11159e-33	3.1552e-31
ENSMUSG00000020926.16	Adam11	a disintegrin and metallopeptidase domain 11	23.7007	1.27357	0.570154	0.000107385	0.000594408
ENSMUSG00000073421.6	H2-Ab1	histocompatibility 2, class II antigen A, beta 1	20483.7	1.27057	0.0165949	0	0
ENSMUSG00000005802.12	Slc30a4	solute carrier family 30 (zinc transporter), member 4	248.249	1.27052	0.135366	3.68141e-22	1.01347e-20
ENSMUSG00000035168.16	Tanc1	tetratricopeptide repeat, ankyrin repeat and coiled-coil containing 1	447.818	1.2699	0.0863003	3.90442e-50	2.83227e-48
ENSMUSG00000044041.4	Krt13	keratin 13	12.2034	1.26946	1.6407	0.000882863	0.00397535
ENSMUSG00000001025.8	S100a6	S100 calcium binding protein A6 (calcyclin)	1479.46	1.26816	0.0521637	1.2531e-131	3.24644e-129
ENSMUSG00000056054.9	S100a8	S100 calcium binding protein A8 (calgranulin A)	998.342	1.26729	0.0959302	5.43881e-41	3.19458e-39
ENSMUSG00000036896.5	C1qc	complement component 1, q subcomponent, C chain	1306.51	1.26537	0.378534	7.49697e-06	5.1329e-05
ENSMUSG00000066278.6	Vps37b	vacuolar protein sorting 37B	78.2402	1.26189	0.328681	1.61287e-06	1.23156e-05
ENSMUSG00000019577.6	Pdk4	pyruvate dehydrogenase kinase, isoenzyme 4	1601.64	1.25642	0.0483005	2.81437e-150	8.87629e-148
ENSMUSG00000030433.15	Sbk2	SH3-binding domain kinase family, member 2	396.418	1.24851	0.0993351	1.96107e-37	1.01976e-35
ENSMUSG00000022220.14	Adcy4	adenylate cyclase 4	170.795	1.24627	0.173599	2.81546e-14	4.82552e-13
ENSMUSG00000041439.15	Mfsd6	major facilitator superfamily domain containing 6	559.572	1.24619	0.07486	2.1711e-63	2.18738e-61
ENSMUSG00000030760.14	Acer3	alkaline ceramidase 3	575.455	1.24373	0.0955531	6.10426e-40	3.44594e-38
ENSMUSG00000074622.4	Mafb	v-maf musculoaponeurotic fibrosarcoma oncogene family, protein B (avian)	464.715	1.24245	0.1505	6.86734e-18	1.49822e-16
ENSMUSG00000008845.9	Cd163	CD163 antigen	28.9997	1.24088	0.469553	4.43142e-05	0.000266436
ENSMUSG00000002831.14	Plin4	perilipin 4	49.3799	1.23872	0.279696	1.69009e-07	1.47443e-06
ENSMUSG00000021823.10	Vcl	vinculin	210.919	1.23415	0.159012	3.44022e-16	6.73558e-15
ENSMUSG00000040584.8	Abcb1a	ATP-binding cassette, sub-family B (MDR/TAP), member 1A	142.505	1.22922	0.170004	1.78527e-14	3.10933e-13
ENSMUSG00000079499.9	6530402F18Rik	RIKEN cDNA 6530402F18 gene	45.9731	1.22665	0.360406	6.05329e-06	4.22217e-05
ENSMUSG00000020340.16	Cyfip2	cytoplasmic FMR1 interacting protein 2	504.672	1.21886	0.0961051	3.85377e-38	2.05553e-36
ENSMUSG00000022816.11	Fstl1	follistatin-like 1	1710.7	1.21829	0.118371	3.56953e-26	1.19324e-24
ENSMUSG00000060550.16	H2-Q7	histocompatibility 2, Q region locus 7	614.915	1.21704	0.0822831	9.16144e-51	6.85125e-49
ENSMUSG00000025491.14	Ifitm1	interferon induced transmembrane protein 1	99.0655	1.21216	0.900454	0.000570456	0.00269319
ENSMUSG00000020577.17	Tspan13	tetraspanin 13	275.025	1.20711	0.12332	5.33439e-24	1.62929e-22
ENSMUSG00000027858.13	Tspan2	tetraspanin 2	44.805	1.20556	0.403977	1.89807e-05	0.000121792
ENSMUSG00000085939.3	NA	NA	1302.46	1.20534	0.0616077	1.66914e-86	2.66109e-84
ENSMUSG00000021990.16	Spata13	spermatogenesis associated 13	278.996	1.20112	0.125911	5.75439e-23	1.65316e-21
ENSMUSG00000043953.12	Ccrl2	chemokine (C-C motif) receptor-like 2	1922.05	1.2011	0.0521681	1.45698e-118	3.40934e-116
ENSMUSG00000029373.7	Pf4	platelet factor 4	136.611	1.19928	0.198561	4.03751e-11	5.26764e-10
ENSMUSG00000029330.8	Cds1	CDP-diacylglycerol synthase 1	64.7301	1.19783	0.297174	7.26303e-07	5.9032e-06
ENSMUSG00000033730.4	Egr3	early growth response 3	132.949	1.19215	0.304347	1.08472e-06	8.50657e-06
ENSMUSG00000025473.16	Adam8	a disintegrin and metallopeptidase domain 8	554.891	1.18962	0.11516	2.01616e-26	6.8342e-25
ENSMUSG00000037148.8	Arhgap10	Rho GTPase activating protein 10	231.073	1.18338	0.14064	1.30801e-18	2.98845e-17
ENSMUSG00000026826.13	Nr4a2	nuclear receptor subfamily 4, group A, member 2	78.4895	1.17747	0.281092	3.80116e-07	3.19509e-06
ENSMUSG00000050530.14	Fam171a1	family with sequence similarity 171, member A1	498.01	1.16058	0.0854932	2.03585e-43	1.24101e-41
ENSMUSG00000022272.17	Myo10	myosin X	88.3376	1.16045	0.261663	1.33447e-07	1.1798e-06
ENSMUSG00000036585.16	Fgf1	fibroblast growth factor 1	358.8	1.15995	0.0967528	1.40394e-34	6.65635e-33
ENSMUSG00000020388.12	Pdlim4	PDZ and LIM domain 4	53.1222	1.15943	0.906836	0.000684677	0.0031675
ENSMUSG00000028459.11	Cd72	CD72 antigen	49.4503	1.15771	0.483891	7.95934e-05	0.000453551
ENSMUSG00000049313.8	Sorl1	sortilin-related receptor, LDLR class A repeats-containing	429.226	1.15323	0.144771	4.39205e-17	9.02547e-16
ENSMUSG00000025351.14	Cd63	CD63 antigen	5009.13	1.15201	0.0320363	1.39277e-284	1.12258e-281
ENSMUSG00000097736.8	9530059O14Rik	RIKEN cDNA 9530059O14 gene	15.6067	1.14771	0.665276	0.000329639	0.0016457
ENSMUSG00000024669.8	Cd5	CD5 antigen	14.5885	1.1445	0.697183	0.000387639	0.00190963
ENSMUSG00000013236.17	Ptprs	protein tyrosine phosphatase, receptor type, S	1839.75	1.14139	0.0441178	4.92345e-149	1.51977e-146
ENSMUSG00000028194.15	Ddah1	dimethylarginine dimethylaminohydrolase 1	111.935	1.13642	0.186896	2.38673e-11	3.16515e-10
ENSMUSG00000042439.13	Zfp532	zinc finger protein 532	309.012	1.13465	0.109188	7.46353e-27	2.57199e-25
ENSMUSG00000000957.11	Mmp14	matrix metallopeptidase 14 (membrane-inserted)	448.405	1.13245	0.136439	2.53928e-18	5.68516e-17
ENSMUSG00000045404.16	Kcnk13	potassium channel, subfamily K, member 13	65.785	1.11656	0.364355	1.44897e-05	9.51638e-05
ENSMUSG00000073802.5	Cdkn2b	cyclin dependent kinase inhibitor 2B	116.917	1.11638	0.179744	9.77108e-12	1.35153e-10
ENSMUSG00000031958.16	Ldhd	lactate dehydrogenase D	170.129	1.11585	0.147665	8.72946e-16	1.66641e-14
ENSMUSG00000074657.5	Kif5a	kinesin family member 5A	103.149	1.11215	0.192619	1.33129e-10	1.6508e-09
ENSMUSG00000036995.7	Asap3	ArfGAP with SH3 domain, ankyrin repeat and PH domain 3	24.5604	1.11081	0.547395	0.000182278	0.000959474
ENSMUSG00000070526.2	Peg12	paternally expressed 12	15.7171	1.11004	0.578466	0.000230829	0.00118712
ENSMUSG00000036098.15	Myrf	myelin regulatory factor	756.435	1.10957	0.0675788	3.68632e-62	3.61359e-60
ENSMUSG00000028217.11	Cdh17	cadherin 17	24.4614	1.09876	0.623536	0.000322443	0.00161311
ENSMUSG00000026180.8	Cxcr2	chemokine (C-X-C motif) receptor 2	512.813	1.09797	0.0976905	5.86219e-31	2.37566e-29
ENSMUSG00000093327.1	Mir5107	microRNA 5107	64.27	1.09589	0.267254	4.47235e-07	3.73976e-06
ENSMUSG00000073409.12	H2-Q6	histocompatibility 2, Q region locus 6	1140.52	1.09456	0.0612083	3.86508e-73	4.83401e-71
ENSMUSG00000001507.16	Itga3	integrin alpha 3	15.6822	1.09139	0.66313	0.000409573	0.00200746
ENSMUSG00000017400.10	Stac2	SH3 and cysteine rich domain 2	815.149	1.09006	0.0709467	6.43652e-55	5.46088e-53
ENSMUSG00000030865.4	Chp2	calcineurin-like EF hand protein 2	26.002	1.08749	1.47764	0.00123777	0.00533279
ENSMUSG00000036957.8	Lrfn3	leucine rich repeat and fibronectin type III domain containing 3	12.1387	1.08629	0.734745	0.000563457	0.00266188
ENSMUSG00000075611.5	NA	NA	98.395	1.08154	0.18939	1.70193e-10	2.09606e-09
ENSMUSG00000020689.4	Itgb3	integrin beta 3	20.9157	1.07921	0.806569	0.000720942	0.00331961
ENSMUSG00000028245.15	Nsmaf	neutral sphingomyelinase (N-SMase) activation associated factor	137.042	1.07793	0.215732	7.79938e-09	7.96295e-08
ENSMUSG00000003545.3	Fosb	FBJ osteosarcoma oncogene B	5515.63	1.07758	0.0287586	0	0
ENSMUSG00000057440.8	Mpp7	membrane protein, palmitoylated 7 (MAGUK p55 subfamily member 7)	488.692	1.07751	0.089264	3.00991e-35	1.46046e-33
ENSMUSG00000054065.12	Pkp3	plakophilin 3	26.0697	1.07319	0.618917	0.000350371	0.00174201
ENSMUSG00000054169.7	Ceacam10	carcinoembryonic antigen-related cell adhesion molecule 10	13.0787	1.07003	1.48899	0.00128202	0.00549793
ENSMUSG00000001493.9	Meox1	mesenchyme homeobox 1	15.7524	1.06669	0.773	0.000687633	0.00318017
ENSMUSG00000111679.1	NA	NA	24.2782	1.06111	0.597014	0.000324184	0.0016207
ENSMUSG00000026628.13	Atf3	activating transcription factor 3	2536.97	1.06077	0.044306	2.16979e-128	5.42746e-126
ENSMUSG00000090176.1	Cd200r2	Cd200 receptor 2	223.268	1.06048	0.1635	1.3221e-12	1.9918e-11
ENSMUSG00000038179.13	Slamf7	SLAM family member 7	770.892	1.05915	0.123676	1.80526e-19	4.37242e-18
ENSMUSG00000108120.1	NA	NA	15.263	1.05772	0.743105	0.000647463	0.00301747
ENSMUSG00000037606.18	Osbpl5	oxysterol binding protein-like 5	148.691	1.05607	0.155508	1.67399e-13	2.69548e-12
ENSMUSG00000036053.17	Fmnl2	formin-like 2	207.718	1.05323	0.207044	4.58941e-09	4.83537e-08
ENSMUSG00000041729.15	Coro2b	coronin, actin binding protein, 2B	2679.86	1.05306	0.0365891	6.95641e-184	2.96834e-181
ENSMUSG00000031442.21	Mcf2l	mcf.2 transforming sequence-like	56.2983	1.05033	0.329122	9.57857e-06	6.45038e-05
ENSMUSG00000076928.5	NA	NA	19.5501	1.04725	0.657598	0.000479081	0.00230761
ENSMUSG00000006360.11	Crip1	cysteine-rich protein 1 (intestinal)	4485.69	1.0425	0.0345815	2.08533e-201	1.16361e-198
ENSMUSG00000046997.5	Spsb4	splA/ryanodine receptor domain and SOCS box containing 4	20.2969	1.04129	0.861801	0.000933149	0.00417715
ENSMUSG00000044468.14	Tent5c	terminal nucleotidyltransferase 5C	314.32	1.03928	0.134385	1.53023e-16	3.06216e-15
ENSMUSG00000040329.14	Il7	interleukin 7	58.2017	1.03827	0.258475	5.55916e-07	4.59819e-06
ENSMUSG00000028389.12	Zfp37	zinc finger protein 37	18.1963	1.03078	0.724923	0.000675968	0.00313221
ENSMUSG00000028327.14	Stra6l	STRA6-like	1522.62	1.02421	0.0553982	3.91249e-78	5.35494e-76
ENSMUSG00000000409.14	Lck	lymphocyte protein tyrosine kinase	36.8268	1.02327	0.440382	9.68416e-05	0.000542253
ENSMUSG00000056529.7	Ptafr	platelet-activating factor receptor	901.375	1.02281	0.0811763	3.10383e-38	1.67399e-36
ENSMUSG00000095609.2	Gm21188	predicted gene, 21188	282.815	1.01476	0.103374	1.31453e-24	4.06635e-23
ENSMUSG00000036390.8	Gadd45a	growth arrest and DNA-damage-inducible 45 alpha	248.539	1.00118	0.14956	2.65036e-13	4.19317e-12
ENSMUSG00000029304.14	Spp1	secreted phosphoprotein 1	24796.7	1.00011	0.0170554	0	0

## Sheet: Table S2B
Table S2. Differential expression of RNAs in TRAMS in old mice versus young mice
(B) Downregulated genes with false discovery rate (FDR) adjusted p-value <0.05 and log2 fold change < -1.
baseMean: log2 RPMs in control cells at each time point; log2FoldChange: ratios of normalized counts in TRAMs in old mice / young mice.
lfcSE: log fold-change standard error. pvalue: unadjusted p values. padj: FDR-adjusted p value.
ENSEMBL	SYMBOL	GENENAME	baseMean	log2FoldChange	lfcSE	pvalue	padj
ENSMUSG00000110386.1	NA	NA	73.7589	-2.63863	0.262218	3.49894e-26	1.17235e-24
ENSMUSG00000014932.15	Yes1	YES proto-oncogene 1, Src family tyrosine kinase	41.6004	-2.54791	0.318654	8.56947e-18	1.86117e-16
ENSMUSG00000069805.10	Fbp1	fructose bisphosphatase 1	124.212	-2.29553	0.177553	5.83842e-40	3.30874e-38
ENSMUSG00000047222.7	Rnase2a	ribonuclease, RNase A family, 2A (liver, eosinophil-derived neurotoxin)	172.29	-1.99297	0.188788	3.09089e-27	1.09106e-25
ENSMUSG00000019478.16	Rab4a	RAB4A, member RAS oncogene family	14.4875	-1.92356	0.549888	4.50238e-06	3.19885e-05
ENSMUSG00000029814.10	Igf2bp3	insulin-like growth factor 2 mRNA binding protein 3	15.1659	-1.64711	0.613577	3.3987e-05	0.000207964
ENSMUSG00000004814.10	Ccl24	chemokine (C-C motif) ligand 24	38.6531	-1.62255	1.53816	0.00043807	0.00213344
ENSMUSG00000039831.16	Arhgap29	Rho GTPase activating protein 29	48.0411	-1.59404	0.262097	9.63453e-11	1.2123e-09
ENSMUSG00000037362.8	Ccn3	cellular communication network factor 3	15.3124	-1.57726	0.581703	3.40562e-05	0.0002083
ENSMUSG00000066000.12	Zfp979	zinc finger protein 979	57.2835	-1.48413	0.225629	3.89172e-12	5.61802e-11
ENSMUSG00000053338.9	Tarm1	T cell-interacting, activating receptor on myeloid cells 1	58.2588	-1.47966	0.739585	0.000139047	0.0007502
ENSMUSG00000045573.9	Penk	preproenkephalin	56.968	-1.41885	0.221594	1.01362e-11	1.39919e-10
ENSMUSG00000082884.1	NA	NA	1025.25	-1.37779	0.0657946	3.11549e-98	6.10805e-96
ENSMUSG00000063600.14	Egfem1	EGF-like and EMI domain containing 1	38.6463	-1.37695	0.287089	5.02705e-08	4.7114e-07
ENSMUSG00000117465.1	NA	NA	128.897	-1.34775	0.148641	1.00724e-20	2.59556e-19
ENSMUSG00000084834.1	4930565N06Rik	RIKEN cDNA 4930565N06 gene	18.0082	-1.24455	0.667091	0.000227813	0.00117244
ENSMUSG00000023079.14	Gtf2ird1	general transcription factor II I repeat domain-containing 1	37.1392	-1.20522	0.371033	9.27338e-06	6.26342e-05
ENSMUSG00000115148.1	NA	NA	116.836	-1.19685	0.185209	2.88919e-12	4.25115e-11
ENSMUSG00000028218.19	Fam92a	family with sequence similarity 92, member A	37.2025	-1.18898	0.314196	1.71462e-06	1.30444e-05
ENSMUSG00000070291.4	Ddx43	DEAD (Asp-Glu-Ala-Asp) box polypeptide 43	41.9295	-1.17779	0.324614	2.83206e-06	2.08249e-05
ENSMUSG00000115739.1	NA	NA	48.9028	-1.16612	0.264642	1.52806e-07	1.3371e-06
ENSMUSG00000102496.1	NA	NA	12.1469	-1.15956	0.768321	0.000481102	0.00231657
ENSMUSG00000003282.9	Plag1	pleiomorphic adenoma gene 1	62.435	-1.15223	0.265306	1.91926e-07	1.66634e-06
ENSMUSG00000030393.8	Zik1	zinc finger protein interacting with K protein 1	51.3483	-1.14648	0.260749	1.50974e-07	1.32347e-06
ENSMUSG00000097295.1	NA	NA	44.3211	-1.14426	0.30121	1.50667e-06	1.159e-05
ENSMUSG00000110682.1	A530010L16Rik	RIKEN cDNA A530010L16 gene	47.0135	-1.14269	0.289524	8.83526e-07	7.05848e-06
ENSMUSG00000042106.5	Inka1	inka box actin regulator 1	133.748	-1.10875	0.161804	1.39309e-13	2.26327e-12
ENSMUSG00000025104.13	Hdgfl3	HDGF like 3	175.462	-1.0905	0.130368	1.1662e-18	2.67287e-17
ENSMUSG00000032827.15	Ppp1r9a	protein phosphatase 1, regulatory subunit 9A	476.799	-1.07489	0.0841177	4.31374e-39	2.40707e-37
ENSMUSG00000073643.11	Wdfy1	WD repeat and FYVE domain containing 1	717.875	-1.06866	0.0642572	8.26397e-64	8.50309e-62
ENSMUSG00000104388.1	NA	NA	8.04815	-1.0522	0.815999	0.000813746	0.00369741
ENSMUSG00000103509.1	NA	NA	32.1259	-1.04371	0.412526	5.80941e-05	0.000340675
ENSMUSG00000072653.14	Zfp783	zinc finger protein 783	38.9834	-1.02491	0.35945	2.50291e-05	0.000157332
ENSMUSG00000098702.1	1500015A07Rik	RIKEN cDNA 1500015A07 gene	31.5235	-1.01909	0.411019	6.61347e-05	0.000382722
ENSMUSG00000057897.14	Camk2b	calcium/calmodulin-dependent protein kinase II, beta	37.5764	-1.01793	0.339988	1.67537e-05	0.000108559
ENSMUSG00000114496.1	NA	NA	15.1264	-1.01572	0.617942	0.000448437	0.00217662
