# Supplementary material for: Lung environment in healthy old age shapes the phenotype and CCR2-mediated recruitment of a subset of apoptotic, high-turnover alveolar macrophages
Source: Research Square preprint supplement (doi:10.21203/rs.3.rs-7123735/v1), 2025-07-25
Supplement: Supplementary file 3 [file 8fcdbc2d290c1c4d3467f271.docx]

**Key resources table**

| REAGENT or RESOURCE | SOURCE | IDENTIFIER |
| --- | --- | --- |
| **Human Antibodies** | | |
| BD Horizon Brilliant Stain Buffer | BD Bioscience | Cat# 563794  RRID: AB_2869750 |
| Cell Staining Buffer | BioLegend | Cat# 420201 |
| Human TruStain FcX™ (Fc Receptor Blocking Solution) | BioLegend | Cat# 422302  RRID: AB_2818986 |
| TruStain FcX™ PLUS (anti-mouse CD16/32) Antibody | BioLegend | Cat# 156604  RRID: AB_2783137 |
| Brilliant Violet 421™ anti-mouse/human CD11b Antibody | BioLegend | Cat# 101236  RRID: AB_10897942 |
| Brilliant Violet 421™ Rat IgG2b, κ Isotype Ctrl | BioLegend | Cat# 400640  RRID: AB_10895758 |
| Brilliant Violet 785™ anti-human CD11c Antibody | BioLegend | Cat# 337252  RRID: AB_3097503 |
| Brilliant Violet 785™ Mouse IgG1, κ Isotype Ctrl Antibody | BioLegend | Cat# 400170  RRID: AB_11219601 |
| Alexa Fluor® 488 anti-human CD206 (MMR) Antibody | BioLegend | Cat# 321114  RRID: AB_571874 |
| Alexa Fluor® 488 Mouse IgG1, κ Isotype Ctrl (FC) Antibody | BioLegend | Cat# 400129  RRID: AB_2890263 |
| Brilliant Violet 605™ anti-human HLA-DR Antibody | BioLegend | Cat# 307640  RRID: AB_2561913 |
| Brilliant Violet 605™ Mouse IgG2a, κ Isotype Ctrl Antibody | BioLegend | Cat# 400270  RRID: AB_3097669 |
| PerCP/Cyanine5.5 anti-human CD16 Antibody | BioLegend | Cat# 302028  RRID: AB_893262 |
| PerCP/Cyanine5.5 Mouse IgG1, κ Isotype Ctrl Antibody | BioLegend | Cat# 400150  RRID: AB_893680 |
| APC anti-human CD36 Antibody | BioLegend | Cat# 336208  RRID: AB_1279224 |
| APC Mouse IgG2a, κ Isotype Ctrl (FC) Antibody | BioLegend | Cat# 400222  RRID: AB_2891178 |
| PerCP/Cyanine5.5 anti-human CD64 Antibody | BioLegend | Cat# 305024  RRID: AB_2561585 |
| PerCP/Cyanine5.5 Mouse IgG1, κ Isotype Ctrl Antibody | BioLegend | Cat# 400150  RRID: AB_893680 |
| Brilliant Violet 605™ anti-human CD86 Antibody | BioLegend | Cat# 305430  RRID:AB_2563824 |
| Brilliant Violet 605™ Mouse IgG2b, κ Isotype Ctrl Antibody | BioLegend | Cat# 400350  RRID: AB_3097666 |
| Brilliant Violet 605™ anti-human CD192 (CCR2) Antibody | BioLegend | Cat# 357214  RRID: AB_2562702 |
| Brilliant Violet 605™ Mouse IgG2a, κ Isotype Ctrl Antibody | BioLegend | Cat# 400270  RRID: AB_3097669 |
| PerCP/Cyanine5.5 anti-human CX3CR1 Antibody | BioLegend | Cat# 341614  RRID: AB_11219203 |
| PerCP/Cyanine5.5 Rat IgG2b, κ Isotype Ctrl Antibody | BioLegend | Cat# 400632  RRID: AB_893693 |
| PE/Dazzle™ 594 anti-human CD14 Antibody | BioLegend | Cat# 301852  RRID: AB_2629575 |
| PE/Dazzle™ 594 Mouse IgG2a, κ Isotype Ctrl Antibody | BioLegend | Cat# 400276  RRID: AB_3097694 |
| Alexa Fluor® 488 anti-human CD115 (CSF-1R) Antibody | BioLegend | Cat# 347311  RRID: AB_2566757 |
| Alexa Fluor® 488 Rat IgG1, κ Isotype Ctrl Antibody | BioLegend | Cat# 400417  RRID: AB_389319 |
| PE/Dazzle™ 594 anti-human CD95 (Fas) Antibody | BioLegend | Cat# 305634  RRID: AB_2564221 |
| PE/Dazzle™ 594 Mouse IgG1, κ Isotype Ctrl Antibody | BioLegend | Cat# 400176  RRID: AB_2923261 |
| PerCP-Cy5.5 anti-human CD14 | Calibre Scientific | Cat# CAPR-103465 |
|  |  |  |
| **Mouse Antibodies** | | |
| BD OptiBuild™ BUV395 Hamster Anti-Mouse CD95 | BD Bioscience | Cat# 740254  RRID: AB_2739999 |
| BUV395 Armenian Hamster IgG2, λ2 | BD Bioscience | Cat#  RRID |
| BD OptiBuild™ BUV496 Rat Anti-Mouse CD192 (CCR2) | BD Bioscience | Cat# 750043  RRID: AB_2874260 |
| BUV496 Rat IgG2b, κ Isotype Control | BD Bioscience | Cat# 612954  RRID: AB_2869598 |
| Brilliant Violet 421™ anti-mouse CD170 (Siglec-F) Antibody | BioLegend | Cat# 155509  RRID: AB_2810421 |
| Brilliant Violet 421™ Rat IgG2a, κ Isotype Ctrl Antibody | BioLegend | Cat# 400536  RRID: AB_10933427 |
| Brilliant Violet 650™ anti-mouse CD3 Antibody | BioLegend | Cat# 100229  RRID: AB_11204249 |
| Brilliant Violet 650™ Rat IgG2b, κ Isotype Ctrl Antibody | BioLegend | Cat# 400651  RRID: AB_3097674 |
| BD OptiBuild™ BV786 Mouse Anti-Mouse CD64 a and b Alloantigens | BD Bioscience | Cat# 741024  RRID: AB_2740644 |
| BV786 Mouse IgG1, k Isotype Control | BD Bioscience | Cat# 563330  RRID: AB_2869484 |
| Alexa Fluor® 488 anti-mouse/human CD11b Antibody | BioLegend | Cat# 101217  RRID: AB_389305 |
| Alexa Fluor® 488 Rat IgG2b, κ Isotype Ctrl Antibody | BioLegend | Cat# 400625  RRID: AB_389321 |
| PerCP/Cyanine5.5 anti-mouse CD115 (CSF-1R) Antibody | BioLegend | Cat# 135526  RRID: AB_2566461 |
| PerCP/Cyanine5.5 Rat IgG2a, κ Isotype Ctrl Antibody | BioLegend | Cat# 400532  RRID: AB_2864286 |
| PE anti-mouse Ly-6C Antibody | BioLegend | Cat# 128008  RRID: AB_1186132 |
| PE Rat IgG2c, κ Isotype Ctrl Antibody | BioLegend | Cat# 400707  RRID: AB_326573 |
| PE/Cyanine7 anti-mouse CX3CR1 Antibody | BioLegend | Cat# 149016  RRID: AB_2565699 |
| PE/Cyanine7 Mouse IgG2a, κ Isotype Ctrl Antibody | BioLegend | Cat# 400254  RRID: AB_10697032 |
| APC anti-mouse CD45.2 Antibody | BioLegend | Cat# 109814  RRID: AB_389210 |
| APC Mouse IgG2a, κ Isotype Ctrl (FC) Antibody | BioLegend | Cat# 400222  RRID: AB_2891178 |
| Alexa Fluor® 700 anti-mouse Ly-6G Antibody | BioLegend | Cat# 127622  RRID: AB_10643269 |
| Alexa Fluor® 700 Rat IgG2a, κ Isotype Ctrl Antibody | BioLegend | Cat# 400528  RRID: AB_2923249 |
| APC/Cyanine7 anti-mouse CD11c Antibody | BioLegend | Cat# 117324  RRID: AB_830646 |
| APC/Cyanine7 Armenian Hamster IgG Isotype Ctrl Antibody | BioLegend | Cat# 400927  RRID: AB_2923251 |
| Brilliant Violet 421™ anti-mouse/human CD11b Antibody | BioLegend | Cat# 101236  RRID: AB_10897942 |
| Brilliant Violet 421™ Rat IgG2b, κ Isotype Ctrl Antibody | BioLegend | Cat# 400640  RRID: AB_11204247 |
| BD OptiBuild™ BV786 Rat Anti-Mouse CD195 | BD Bioscience | Cat# 743700  RRID: AB_2741682 |
| Rat IgG2c, κ | BD Bioscience | Cat#  RRID |
| PE anti-mouse CD206 (MMR) Antibody | BioLegend | Cat# 141706  RRID: AB_1089575 |
| PE Rat IgG2a, κ Isotype Ctrl Antibody | BioLegend | Cat# 400508  RRID: AB_326530 |
| PE/Cyanine7 anti-mouse CD170 (Siglec-F) Antibody | BioLegend | Cat# 155528  RRID: AB_2890715 |
| PE/Cyanine7 Rat IgG2a, κ Isotype Ctrl | BioLegend | Cat# 400522  RRID: AB_326542 |
| APC anti-mouse CD45.2 Antibody | BioLegend | Cat# 109814  RRID: AB_389210 |
| APC Mouse IgG2a, κ Isotype Ctrl (FC) Antibody | BioLegend | Cat# AB_2891178  RRID: 400222 |
| APC Rat Anti-Mouse CD45 | BD Bioscience | Cat# 559864  RRID: AB_398672 |
| APC Rat IgG2b, κ Isotype Control | BD Bioscience | Cat# 553991  RRID: AB_10050405 |
| Brilliant Violet 650™ anti-mouse F4/80 Antibody | BioLegend | Cat# 123149  RRID: AB_2564589 |
| Brilliant Violet 650™ Rat IgG2a, κ Isotype Ctrl Antibody | BioLegend | Cat# 400542  RRID: AB_11123911 |
| PerCP/Cyanine5.5 anti-mouse CD45.1 Antibody | BioLegend | Cat# 110728  RRID: AB_893346 |
| PerCP/Cyanine5.5 Mouse IgG2a, κ Isotype Ctrl Antibody | BioLegend | Cat# 400258  RRID: AB_10695169 |
| CellEvent™ Caspase-3/7 Green Flow Cytometry Assay Kit | Thermo Fisher Scientific/Invitrogen | Cat# C10427  RRID |
| Caspase-8 p18 Antibody (E-8): sc-166320 | Santa Cruz Biotechnology | Cat# sc-166320  RRID |
| Purified NA/LE Hamster Anti-Mouse CD178 | BD Bioscience | Cat# 555290  RRID: AB_395708 |
| Purified Hamster IgG1, κ Isotype Control | BD Bioscience | Cat# 553969  RRID |
| Zombie Green™ Fixable Viability Kit | BioLegend | Cat# 423112 |
| APC Annexin V | BioLegend | Cat# 640941 |
| Annexin V Binding Buffer | BioLegend | Cat# 422201 |
|  |  |  |
| **Bacterial and virus strains** | | |
| **Biological samples** |  |  |
| Mouse alveolar macrophages | This manuscript | N/A |
| Human alveolar macrophages | This manuscript | N/A |
| Baboon alveolar macrophages | This manuscript | N/A |
| Heparinized whole blood from mice | This manuscript | N/A |
| **Chemicals, peptides, and recombinant proteins** | | |
| Clodronate Liposomes | Liposoma research | Cat# CP-005-005 |
| Control Liposomes (PBS) | Liposoma research | Cat# CP-005-005 |
| RPMI 1640 Medium, GlutaMAX™ Supplement | Gibco / Invitrogen, Thermo Fisher Scientific | Cat# 11875-093;  Cat# 61870044 |
| Human AB serum | Sigma Aldrich | Cat# H4522 |
| Lymphoprep | Stem Cell Technologies | Cat# 07851 |
| Ficoll-paque PLUS | GE healthcare/Sigma | Cat# 17-1440-03 |
| EDTA, 0.5M | Thermo Fisher Scientific | Cat# 15575020 |
| Heparin sodium, 1000 U/mL | Nationwide medical surgical/ Sagent Pharmaceuticals | Cat #25021040010 |
| Gibco™ cell dissociation buffer | Thermo Fisher Scientific | Cat# 13-150-016 |
| 0.9% sodium chloride, irrigation | Abbott Laboratories |  |
| MitoSOX™ Mitochondrial superoxide indicators Red | Thermo Fisher Scientific | Cat# M36008 |
| TRIzol reagent | Invitrogen/ Thermo Fisher Scientific | Cat# 15596026 |
| Hema 3 staining | Fisher Scientific | Cat# 22122911 |
| Amicon® Ultra Centrifugal Filter, 10 kDa MWCO | Millipore Sigma | Cat# UFC801024 |
| DPBS 1x, no calcium, no magnesium | Thermo Fisher Scientific | Cat# 14190169 |
| **Critical commercial assays** | | |
| Classical monocyte isolation kit | Miltenyi | Cat# 130-117-337 |
| EasySep™ Mouse Monocyte Isolation Kit | Stem Cell technologies | Cat# 19861 |
| EasySep™ Buffer | Stem Cell technologies | Cat# 20144 |
| High-Capacity RNA-to-cDNA Kit | Applied Biosystems | Cat# 4387406 |
| TaqMan Fast Universal PCR Master Mix (2X), no AmpErase UNG | Thermo Fisher Scientific | Cat# 4352042 |
| Luminex mouse Discovery Assay (10-Plex) | R&D Systems, Inc. | Cat# LXSAMSM-10kit  Code: mxmbhKZn |
| Oligomycin A | Millipore Sigma | Cat# 75351-5MG |
| FCCP (Carbonyl cyanide 4-(trifluoromethoxy)phenylhydrazone) | Millipore Sigma | Cat# C2920-10MG |
| Antimycin A from Streptomyces sp. | Millipore Sigma | Cat# A8674-50MG |
| Rotenone | Millipore Sigma | Cat# 557368-1GM |
| 2-Deoxy-D-glucose | Millipore Sigma | Cat# D6134-5G |
|  |  |  |
| Collagenase from Clostridium histolyticum | Millipore Sigma | Cat# C7657-500MG |
| Deoxyribonuclease I from bovine pancreas | Millipore Sigma | Cat# D5025-150KU |
|  |  |  |
| **qRT-PCR Primers** | | |
| **Human Primers** |  |  |
| *CD11B* | Thermo Fisher Scientific | Cat# Hs00167304_m1 |
| *CD11C* | Thermo Fisher Scientific | Cat# Hs00174217_m1 |
| *MRC1 (CD206)* | Thermo Fisher Scientific | Cat# Hs00267207_m1 |
| *NOS2* | Thermo Fisher Scientific | Cat# Hs01075529_m1 |
| *HIF1A* | Thermo Fisher Scientific | Cat# Hs00153153_m1 |
| *FAS* | Thermo Fisher Scientific | Cat# Hs00236330_m1 |
| *TLR2* | Thermo Fisher Scientific | Cat# Hs00152932_m1 |
| *PIEZO1* | Thermo Fisher Scientific | Cat# Hs00207230_m1 |
| *IFNB* | Thermo Fisher Scientific | Cat# Hs01077958_s1 |
| *IL10* | Thermo Fisher Scientific | Cat# Hs00961622_m1 |
| *CCR2* | Thermo Fisher Scientific | Cat# Hs00356601_m1 |
| *CX3CR1* | Thermo Fisher Scientific | Cat# Hs00365842_m1 |
| *NDUFAF6* | Thermo Fisher Scientific | Cat# Hs00901870_m1 |
| *LDHA* | Thermo Fisher Scientific | Cat# Hs01378790_g1 |
| *ACTB* | Thermo Fisher Scientific | Cat# Hs01060665_g1 |
|  |  |  |
| **Mouse primers** |  |  |
| *Hif1α* |  | Forward Primer  ACCTTCATCGGAAACTCCAAAG  Reverse Primer  CTGTTAGGCTGGGAAAAGTTAGG |
| *Cox2* |  | Forward Primer  CTGGCGCTCAGCCATACAG  Reverse Primer  CGCACTTATACTGGTCAAATCCC |
| *Cd74* |  | Forward Primer  AGTGCGACGAGAACGGTAAC  Reverse Primer  CGTTGGGGAACACACACCA |
| *Mif* |  | Forward Primer  GCCAGAGGGGTTTCTGTCG  Reverse Primer  GTTCGTGCCGCTAAAGTCA |
| *Glut1* |  | Forward Primer  CAGTTCGGCTATAACACTGGTG  Reverse Primer  GCCCCGACAGAGAAGATG |
| *Hk2* |  | Forward Primer  TGATCGCCTGCTTATTCACGG  Reverse Primer  AACCGCCTAGAAATCTCCAGA |
| *Pfkb3* |  | Forward Primer  CCCAGAGCCGGGTACAGAA  Reverse Primer  GGGGAGTTGGTCAGCTTCG |
| *Gls1* |  | Forward Primer  CTACAGGATTGCGAACATCTGATReverse Primer  ACACCATCTGACGTTGTCTGA |
| *Slc25a* |  | Forward Primer  GAGGCATCGAAATCTGCATCA  Reverse Primer  GGATGGAGCCGTAGAGCAA |
| *Acly* |  | Forward Primer  CAGCCAAGGCAATTTCAGAGC  Reverse Primer  CTCGACGTTTGATTAACTGGTCT |
| *Actb* |  | Forward Primer  TACAGCTTCACCACCACAGC  Reverse Primer  AAGGAAGGCTGGAAAAGAGC |
|  |  |  |
| **Recombinant DNA** | | |
|  | | |
| **Deposited data** | | |
| NCBI GEO database: GSE297392 |  |  |
|  | | |
| **Software and algorithms** | | |
| Prism software 9.3.1 | GraphPad by Domatics | N/A |
| FlowJo 10.8.1 | BD Biosciences | N/A |
| ViiA™ 7 Software | Thermo Fisher Scientific | N/A |
| **Other** | | |
|  |  |  |
| Nunc™ 96-Well Polystyrene Conical Bottom MicroWell™ Plates | Thermo Fisher Scientific | Cat# 249570 |
| QuadroMACS™ Separator | Miltenyi | Cat# 130-090-976 |
| EasySep™ Magnet | Stem Cell technologies | Cat# 18000 |
| 50 mL Falcon tubes | Corning | Cat# 352098 |
| 15 mL Falcon tubes | Thomas Scientific | Cat# 12-565-269 |
|  |  |  |
| BD FACSymphony™ | BD | N/A |
| ViiA 7 Real-Time PCR System | Thermo Fisher Scientific | N/A |
| Glass tubes for serum | Corning (Fisher) | Cat# 8422-50 (05-588-5B) |
| Shandon™ EZ Single Cytofunnel™ | Fisher Scientific | Cat# A78710020 |
| Epredia™ Cytoslide™ Microscope Slides | Fisher Scientific | Cat# 5991059 |
|  |  |  |
|  |  |  |
| Steriflip-GP Sterile Centrifuge Tube Top Filter Unit | Millipore/Sigma | Cat# SCGP00525 |
| FalconTM round-bottom polypropylene tubes | FalconTM | Cat#352063 |
| Falcon™ round-bottom polystyrene tubes with cell strainer snap cap, 5mL | Falcon™ | Cat#352235 |
